# Supplementary material for: QQ-SNV: single nucleotide variant detection at low frequency by comparing the quality quantiles
Source: PubMed Central journal article supplement (PMC4641353; doi:10.1186/s12859-015-0812-9), 2015-11-10
Supplement: 12859_2015_812_MOESM1_ESM.pdf [file 12859_2015_812_MOESM1_ESM.pdf]

Figure S1. Quality scores Illumina ("raw")

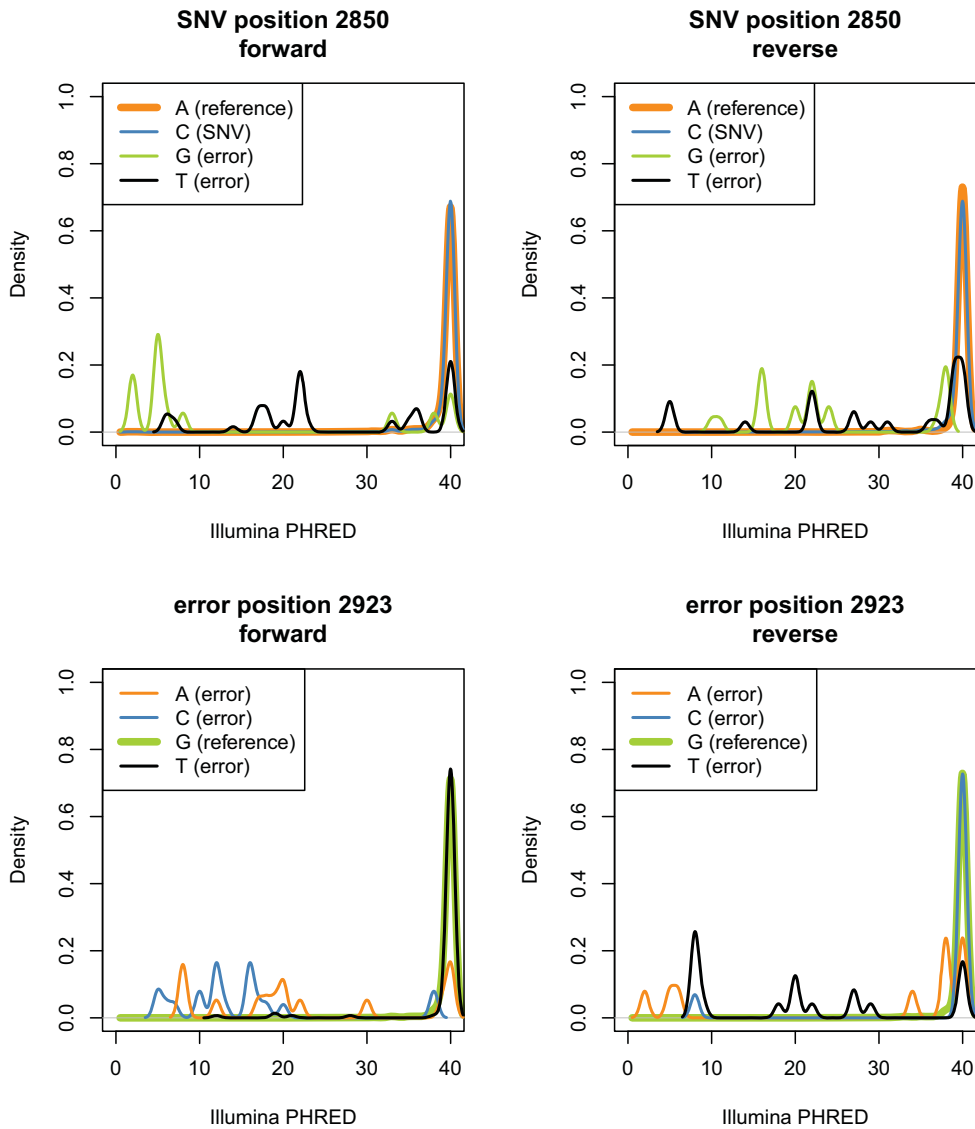

Distributional density of the Illumina PHRED scores per nucleotide (A/C/G/T) in the forward and reverse read mapping at SNV position 2850 and at error position 2923 for training sample 1 (out of 96 *in silico* read sets). The probability density distribution is different for errors compared to "no error" (reference/SNV) in forward and/or reverse read direction.

Figure S2. Quality Quantile plot ("raw")

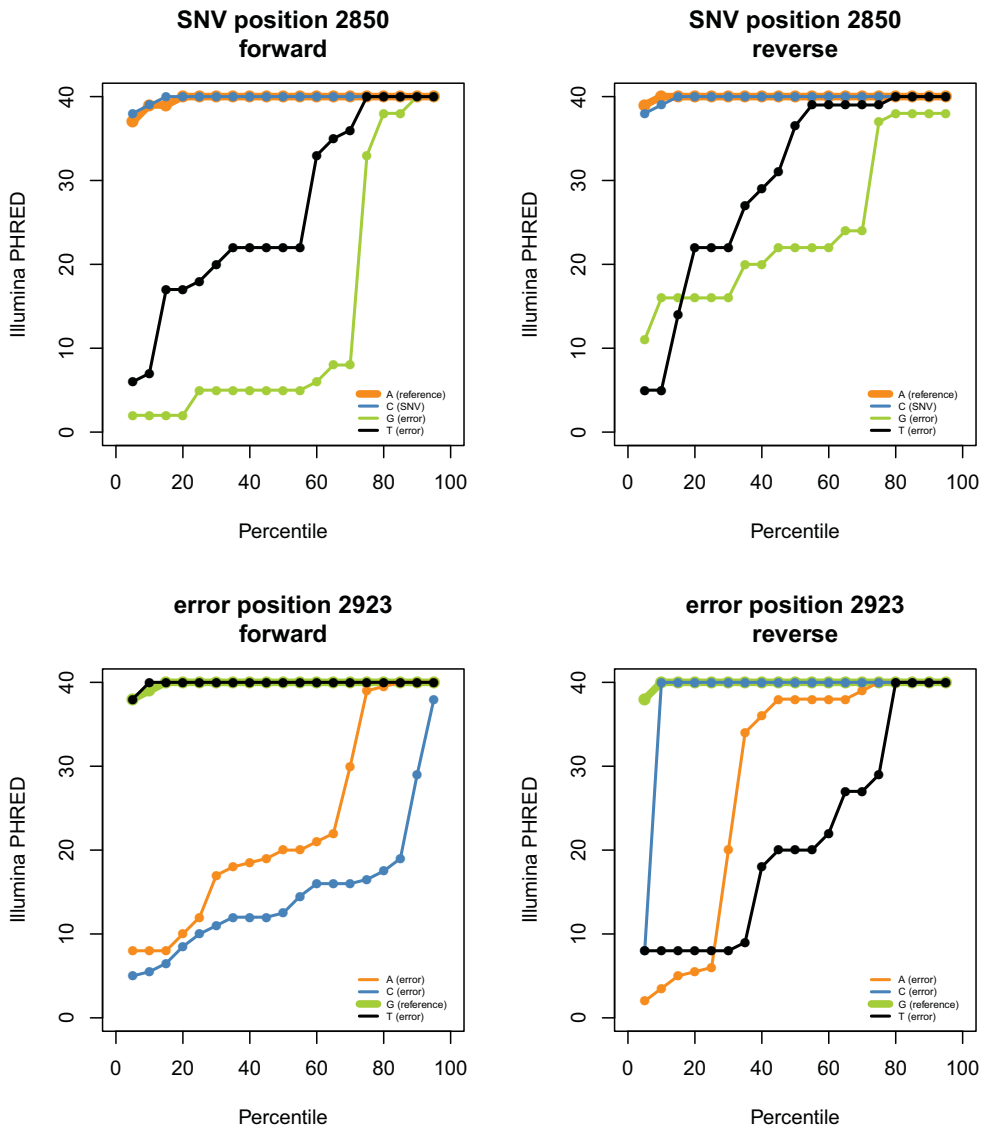

Illumina PHRED scores per nucleotide (A/C/G/T) in the forward and reverse read mapping summarized for nineteen percentiles (5<sup>th</sup>, 10<sup>th</sup>, ..., 95<sup>th</sup>) at SNV position 2850 and at error position 2923 for training sample 1 (out of 96 *in silico* read sets). The cumulative distribution is different for errors compared to "no error" (reference/SNV) in forward and/or reverse read direction.

Figure S3. Quality scores recalibrated

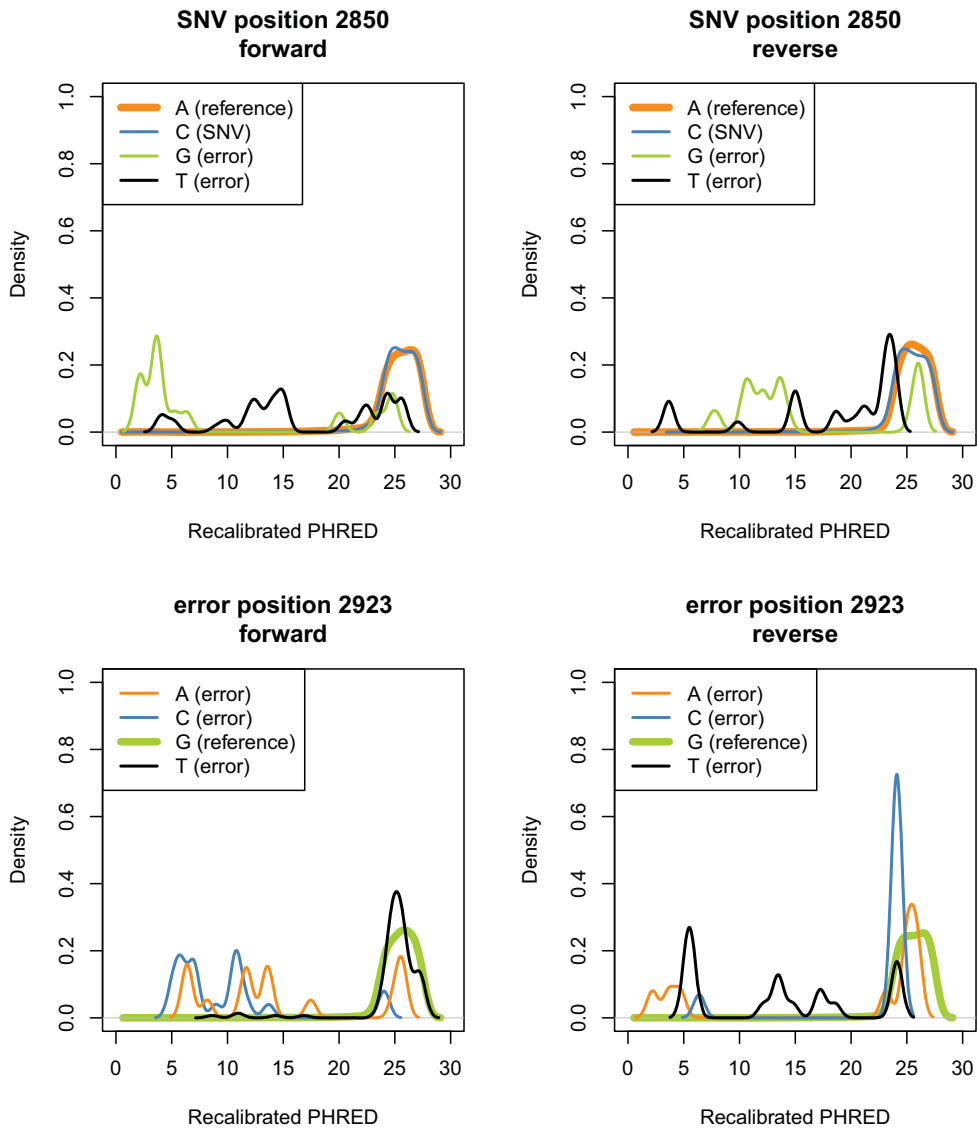

Distributional density of the recalibrated PHRED scores per nucleotide (A/C/G/T) in the forward and reverse read mapping at SNV position 2850 and at error position 2923 for training sample 1 (out of 96 *in silico* read sets). The probability density distribution is different for errors compared to "no error" (reference/SNV) in forward and reverse read direction.

Figure S4. Quality Quantile plot (recalibrated)

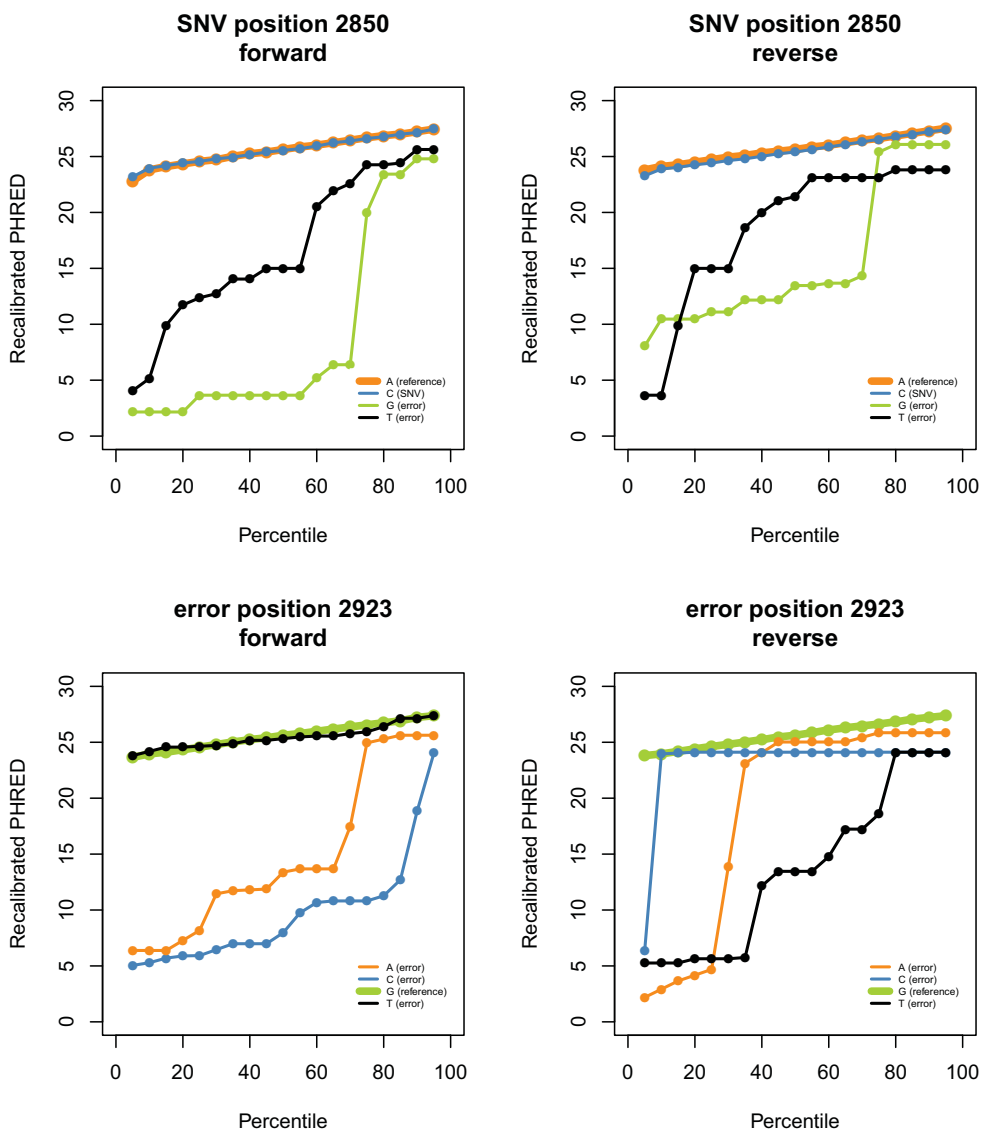

Recalibrated PHRED scores per nucleotide (A/C/G/T) in the forward and reverse read mapping summarized for nineteen percentiles (5<sup>th</sup>, 10<sup>th</sup>, ..., 95<sup>th</sup>) at SNV position 2850 and at error position 2923 for training sample 1 (out of 96 *in silico* read sets). The cumulative distribution is different for errors compared to "no error" (reference/SNV) in forward and reverse read direction.

Figure S5. Coverage of plasmids in FASTQ/1 training data

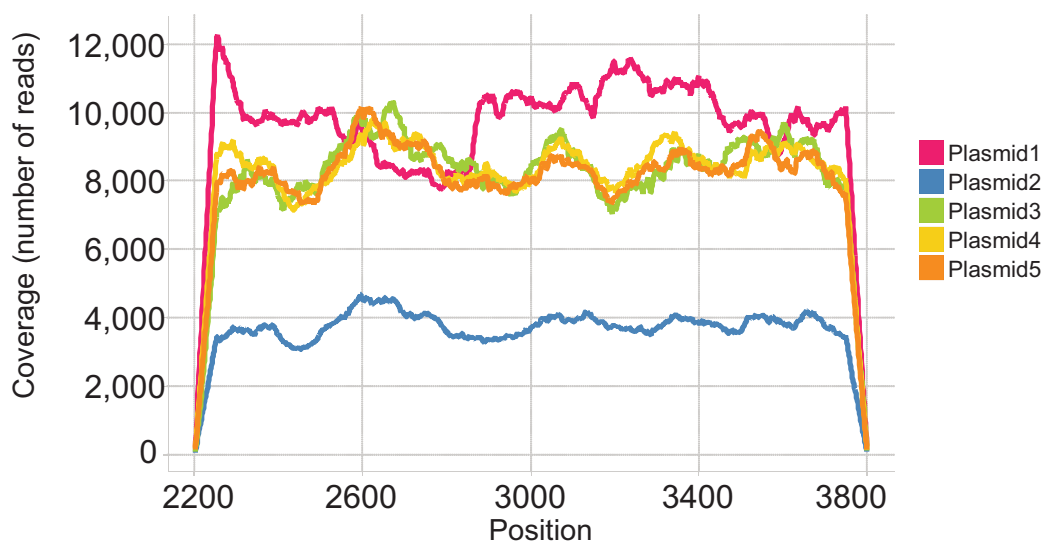

Five HIV-1 plasmids were sequenced with Illumina GAIIX in one lane. The coverage per plasmid derived from a total of 1,183,162 reads, with at least one nucleotide in the PR-RT region from nucleotide position 2253 to 3749, is shown.

Figure S6. SNVs in *in silico* set of 960 samples

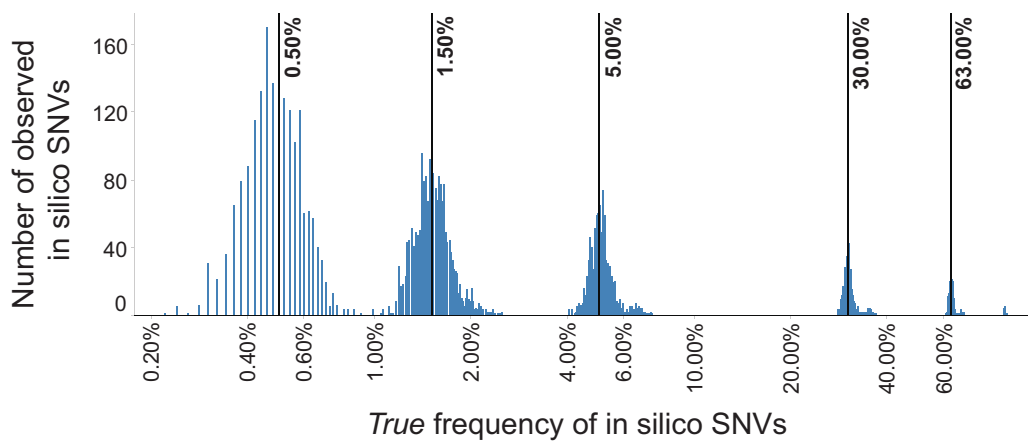

Distribution of so-called *true* frequencies of 9,600 *in silico* SNVs (10 per sample). The 1,920 variants with *true* frequency equal to 100% (always present) at position 2259 and 2927 are not shown. On the y-axis in the histogram are the number of variants with the same *true* frequency sampled around the five chosen frequencies (0.5%, 1.5%, 5%, 30%, and 63%). The *true* frequencies on the x-axis are shown in log<sub>10</sub> scale.

Figure S7. QQnorm

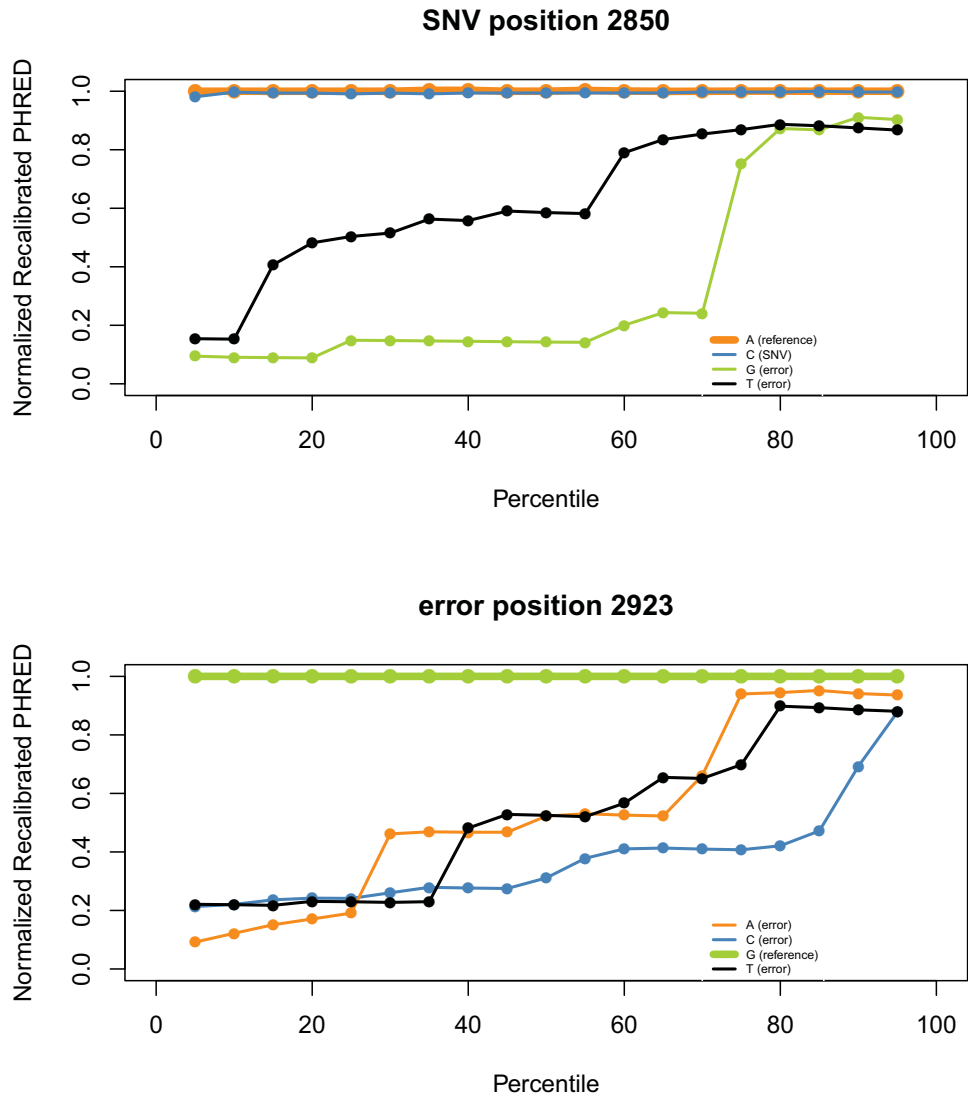

Normalized recalibrated PHRED scores per nucleotide (A/C/G/T) minimized over the read mapping direction (forward/reverse) and calculated for nineteen percentiles (5<sup>th</sup>, 10<sup>th</sup>, ..., 95<sup>th</sup>) at SNV position 2850 and at error position 2923 for training sample 1 (out of 96 *in silico* read sets).

Figure S8. QQ

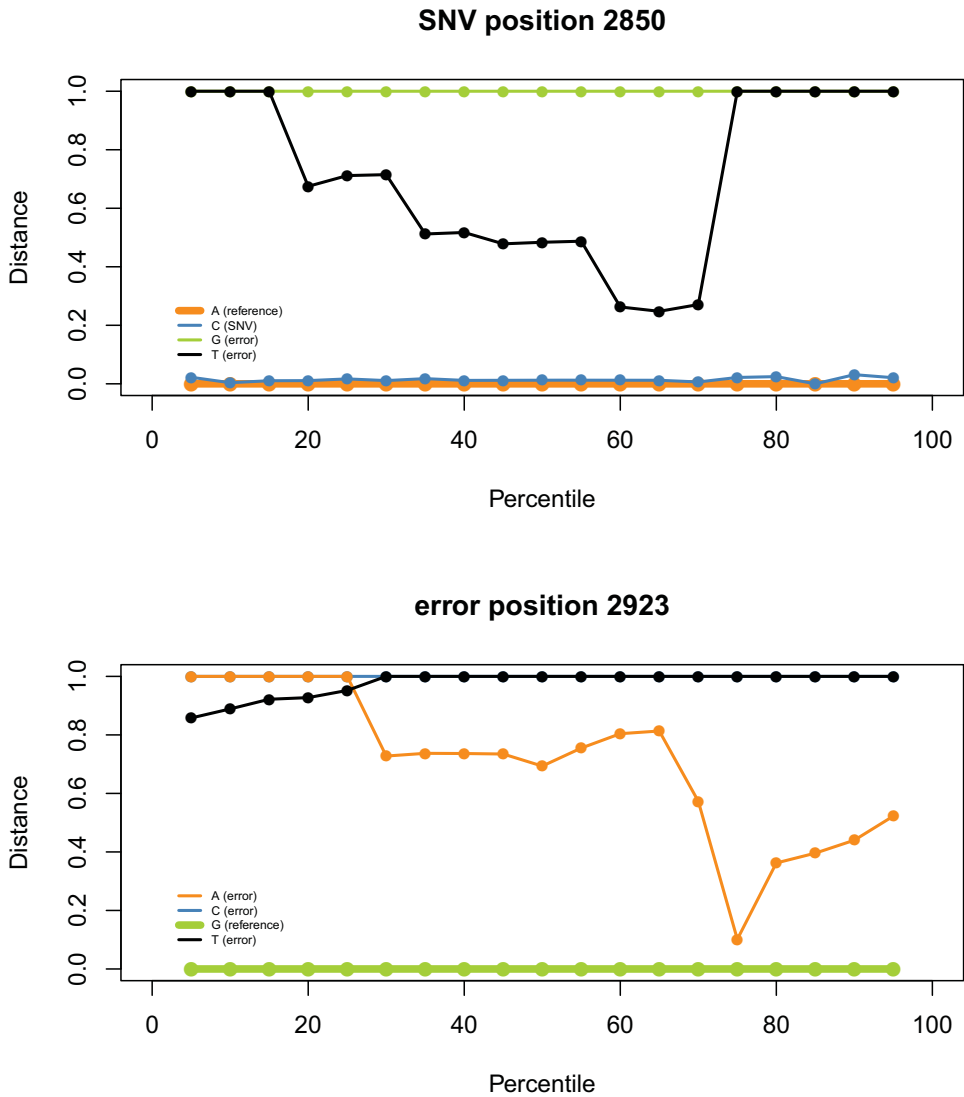

Distance per nucleotide (A/C/G/T) in the range [0,1] maximized over the read mapping direction (forward/reverse) and calculated for nineteen percentiles (5<sup>th</sup>, 10<sup>th</sup>, ..., 95<sup>th</sup>) relative to the nucleotide with worst quality at SNV position 2850 and at error position 2923 for training sample 1 (out of 96 *in silico* read sets).



Figure S9. D

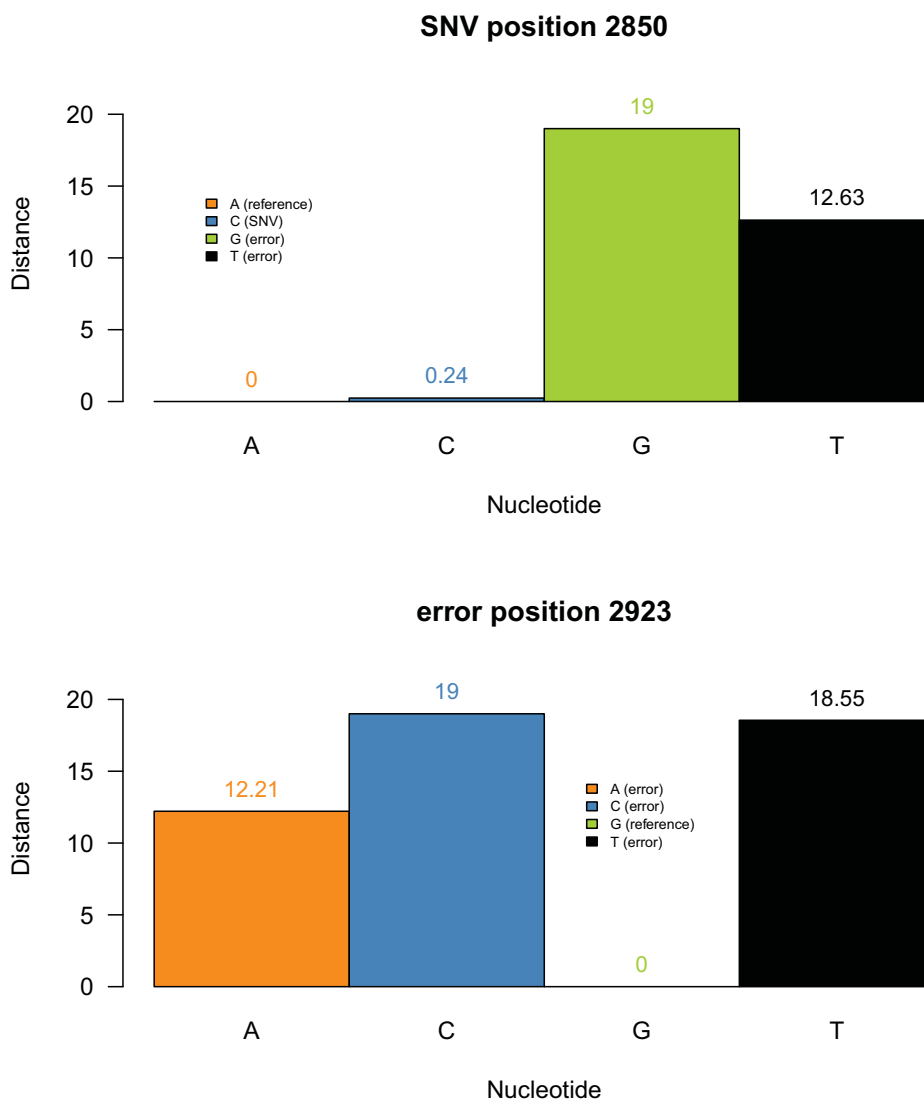

Distance per nucleotide (A/C/G/T) in the range [0,19] maximized over the read mapping direction (forward/reverse) and calculated as the sum of distances for nineteen percentiles (5<sup>th</sup>, 10<sup>th</sup>, ..., 95<sup>th</sup>) relative to the nucleotide with worst quality at SNV position 2850 and at error position 2923 for training sample 1 (out of 96 *in silico* read sets).

Figure S10.  
ROC curves for QQ-SNV without variant frequency filtering on  
HCV plasmid mixture test datasets

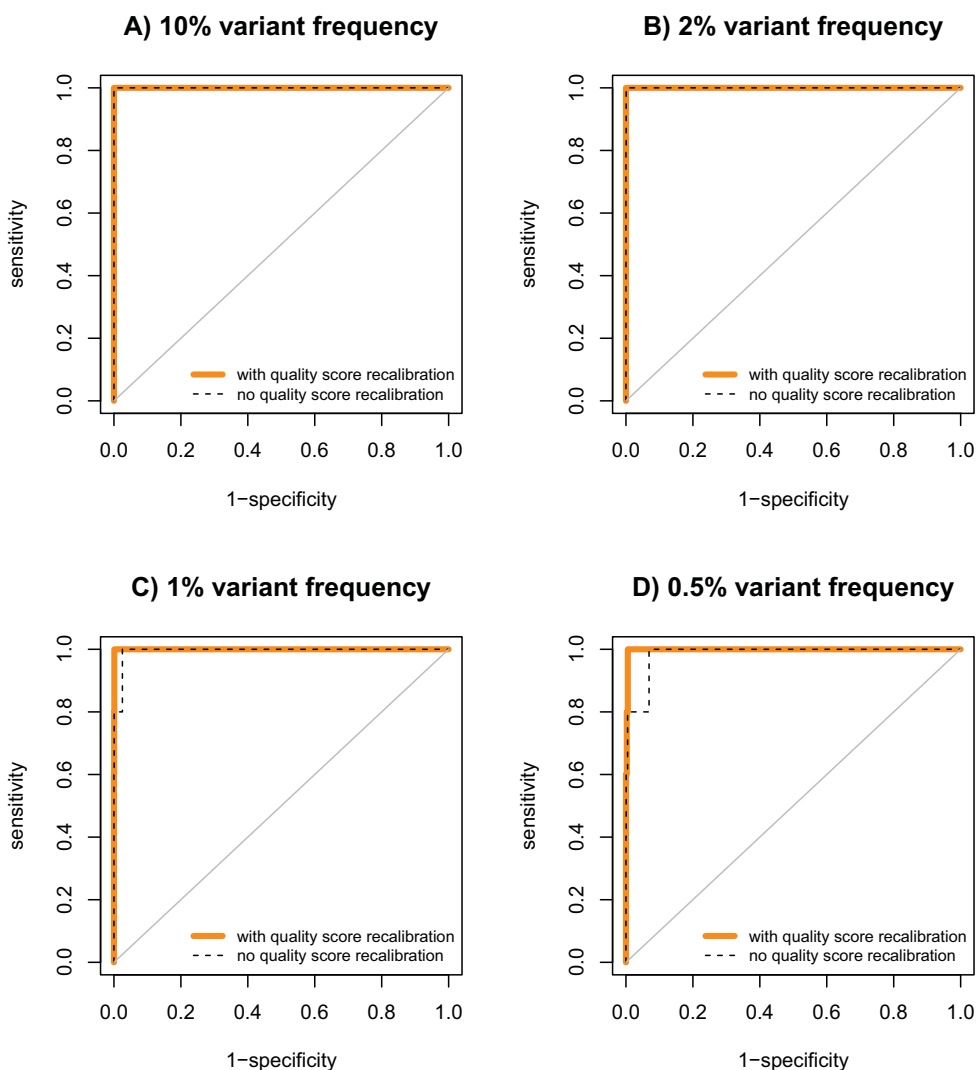

ROC curves for QQ-SNV without variant frequency filtering on HCV plasmid mixture datasets (all paired-end reads) with different spiked-in variant frequencies A) 10% B) 2% C) 1% and D) 0.5%, and comparing quality score recalibration vs. no quality score recalibration.

Figure S11. QQnorm.dir

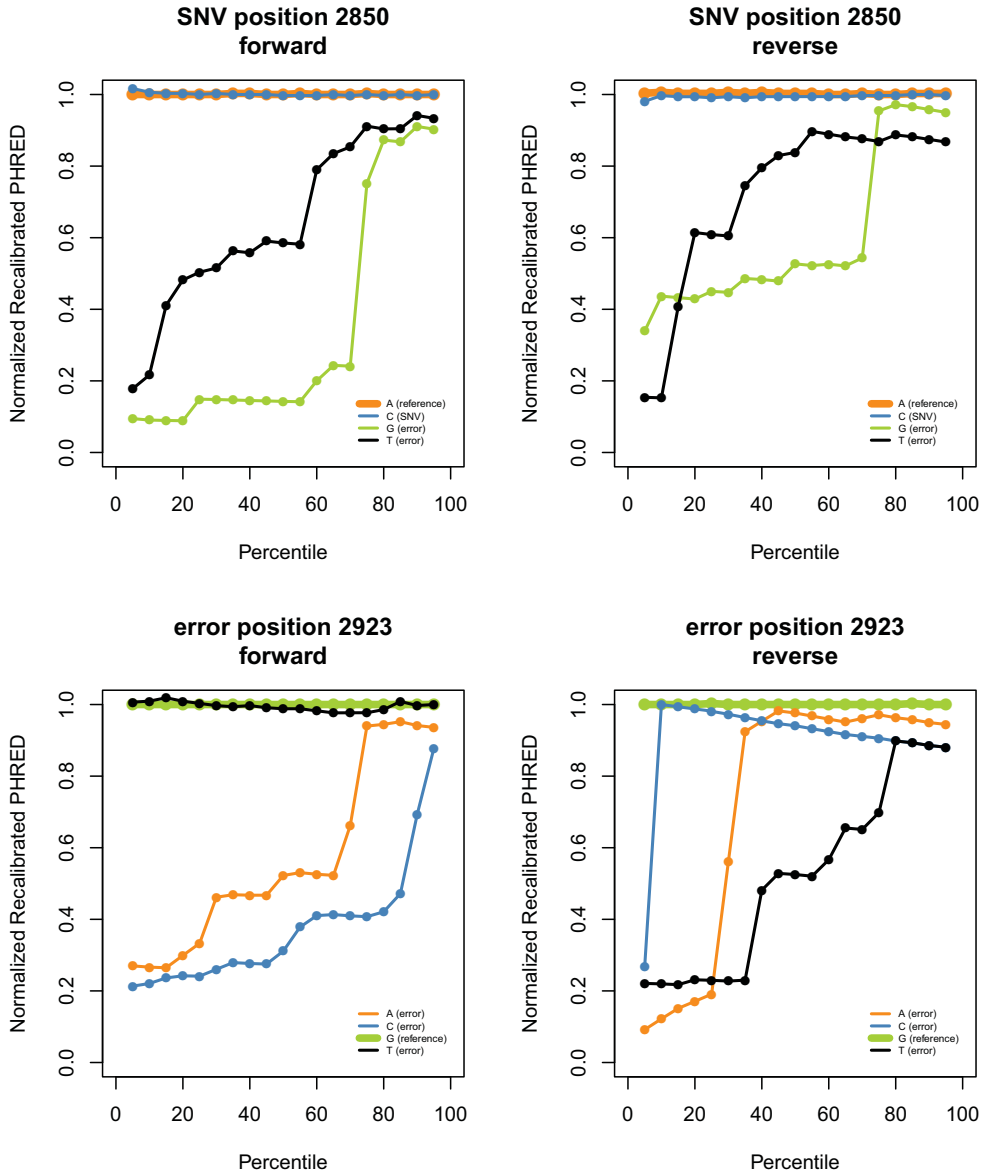

Normalized recalibrated PHRED scores per nucleotide (A/C/G/T) in the forward and reverse read mapping and calculated for nineteen percentiles (5<sup>th</sup>, 10<sup>th</sup>, ..., 95<sup>th</sup>) at SNV position 2850 and at error position 2923 for training sample 1 (out of 96 *in silico* read sets).

Figure S12. QQ.dir

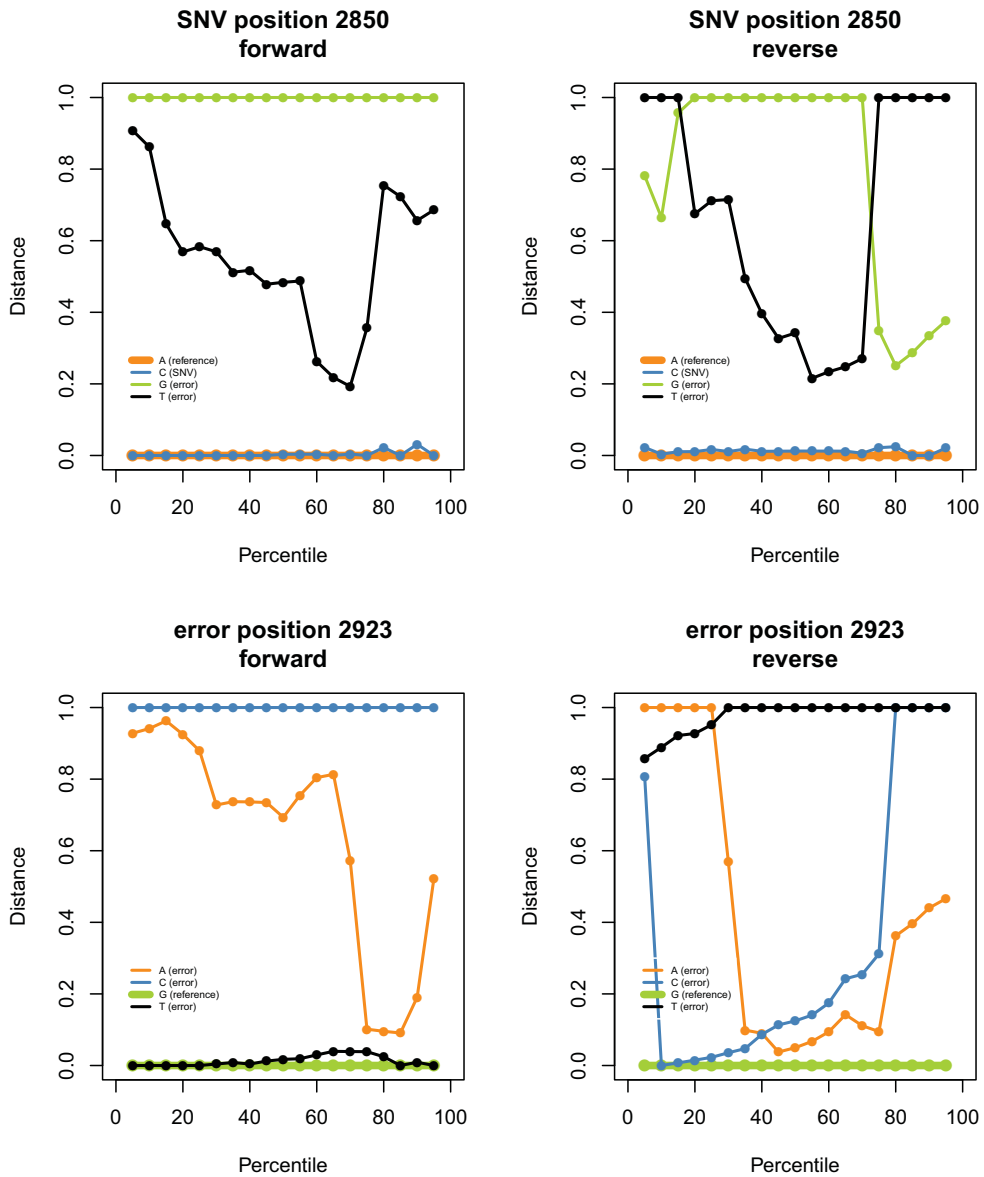

Distance per nucleotide (A/C/G/T) in the range [0,1] in the forward and reverse read mapping and calculated for nineteen percentiles (5<sup>th</sup>, 10<sup>th</sup>, ..., 95<sup>th</sup>) relative to the nucleotide with worst quality at SNV position 2850 and at error position 2923 for training sample 1 (out of 96 *in silico* read sets).

Figure S13. D.dir

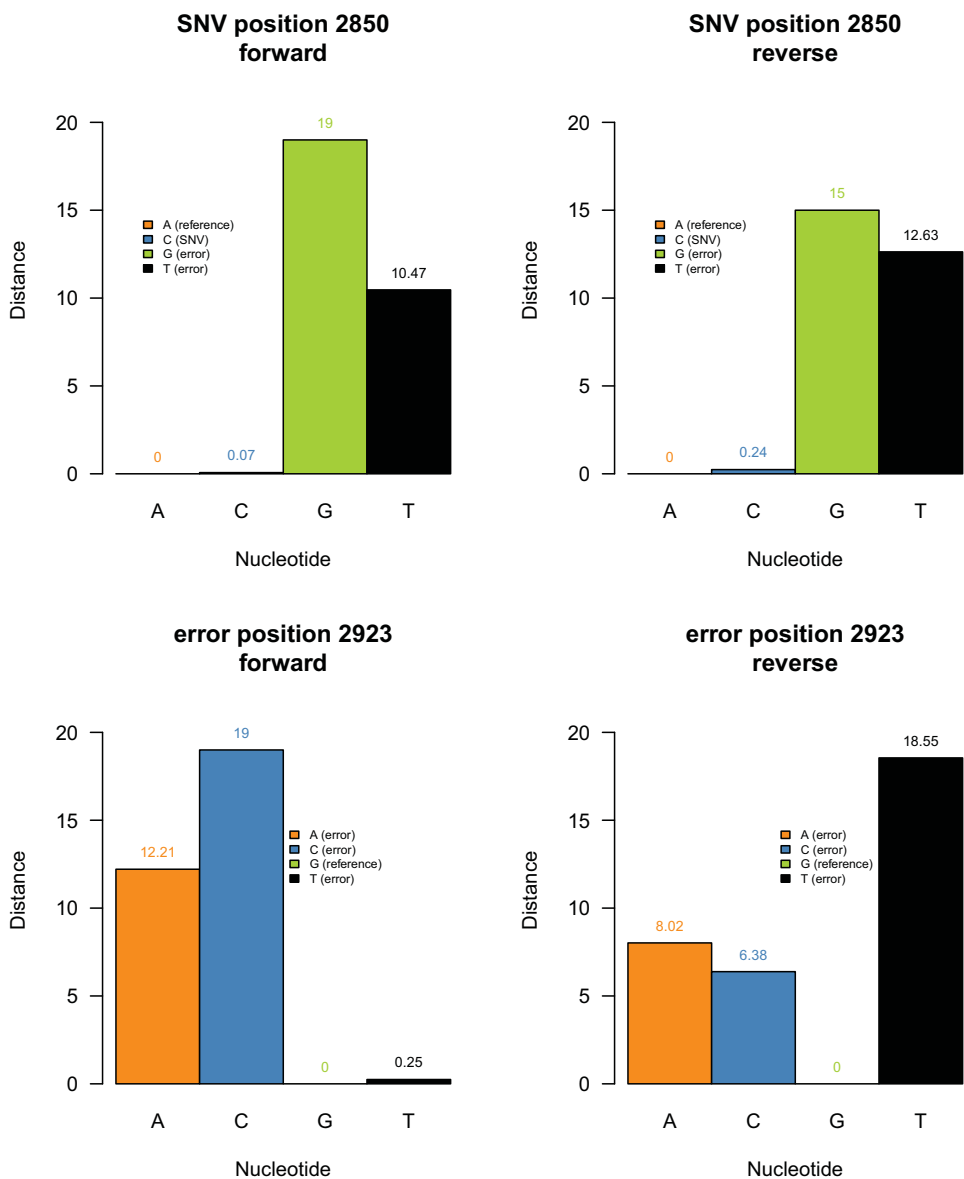

Distance per nucleotide (A/C/G/T) in the range [0,19] in the forward and reverse read mapping and calculated as the sum of distances for nineteen percentiles (5<sup>th</sup>, 10<sup>th</sup>, ..., 95<sup>th</sup>) relative to the nucleotide with worst quality at SNV position 2850 and at error position 2923 for training sample 1 (out of 96 *in silico* read sets).

Figure S14.  
 Training of the QQ-SNV model by weighted logistic regression

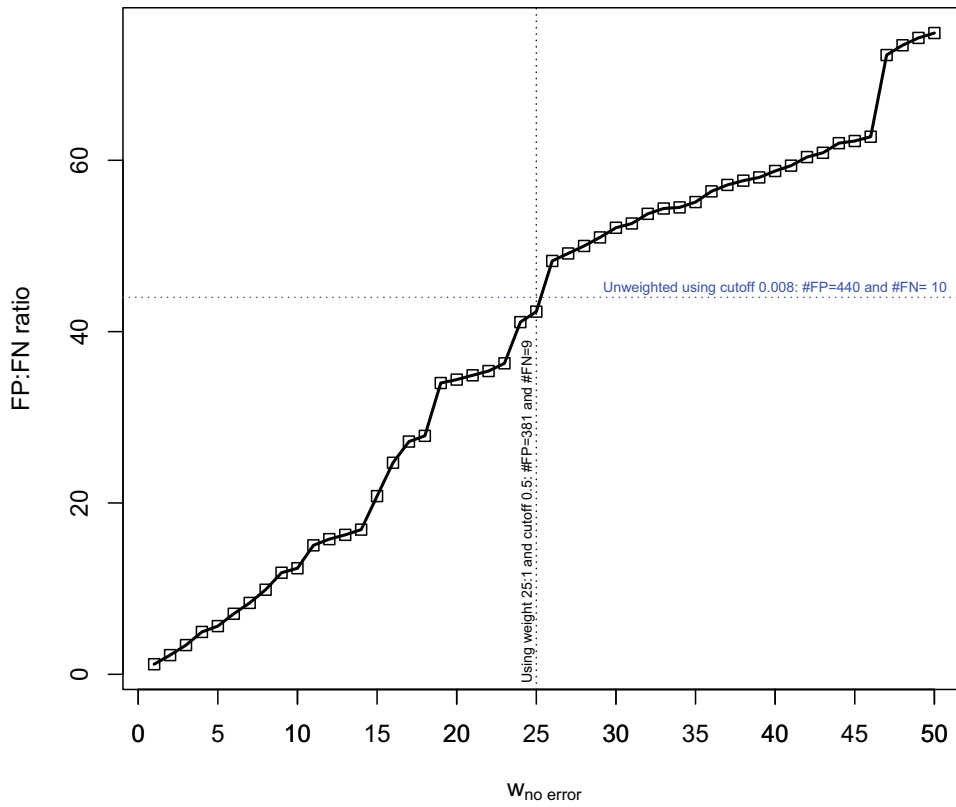

False positive : false negative ratio on the training data when varying the logistic regression weight  $w_{\text{no error}}$  ( $w_{\text{error}}=1$ ) and using cutoff 0.5 for error/no error classification (QQ-SNV<sub>D</sub>).

Figure S15.  
Performance on plasmid mixture test datasets

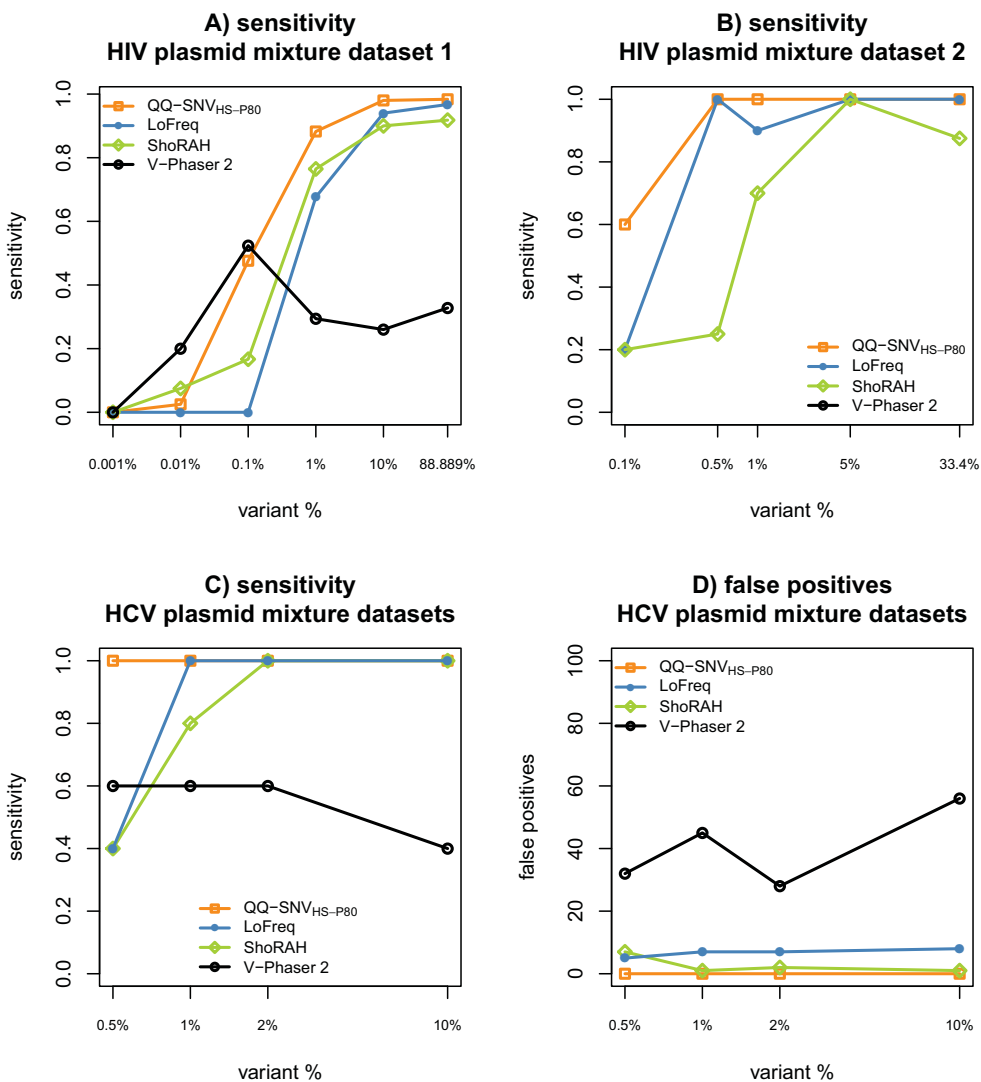

Performance of QQ-SNV<sub>HS-P80</sub>, LoFreq, ShoRAH, and V-Phaser 2 on plasmid mixture test datasets by variant frequency (curves for Table 3–5). A) sensitivity on HIV plasmid mixture dataset 1 (Table 3). B) sensitivity on HIV plasmid mixture dataset 2 (Table 4) (variant frequencies shown for n>5 only). C) and D) sensitivity and false positives on HCV plasmid mixture datasets (all paired-end reads) (Table 5).

Figure S16.  
ROC curves for QQ-SNV without variant frequency filtering  
at different coverage depths

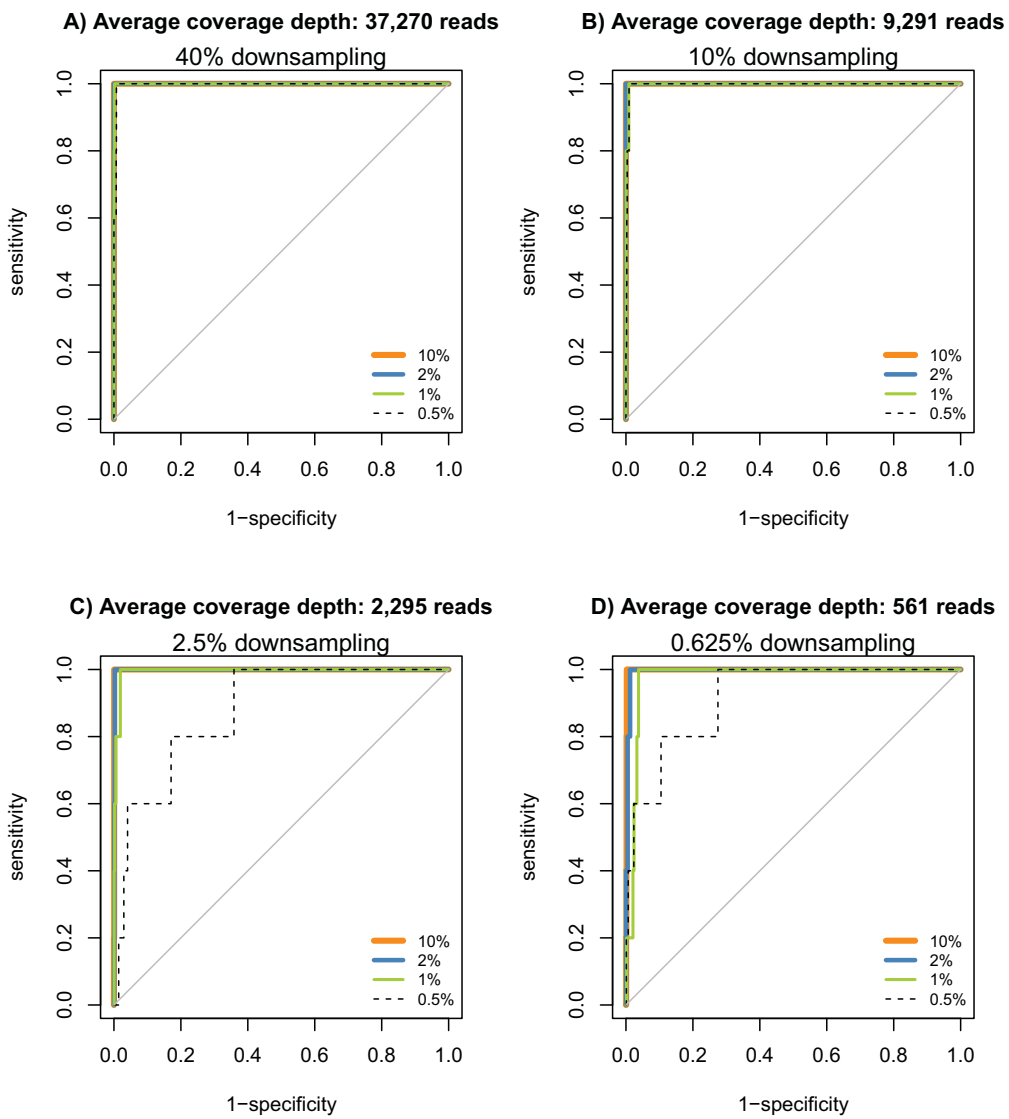

ROC curves for QQ-SNV without variant frequency filtering on HCV plasmid mixture datasets (all paired-end reads) at different coverage depths by downsampling A) 40% B) 10% C) 2.5% and D) 0.625%.



Figure S17.  
ROC curves for QQ-SNV with P50 variant frequency filtering  
at different coverage depths

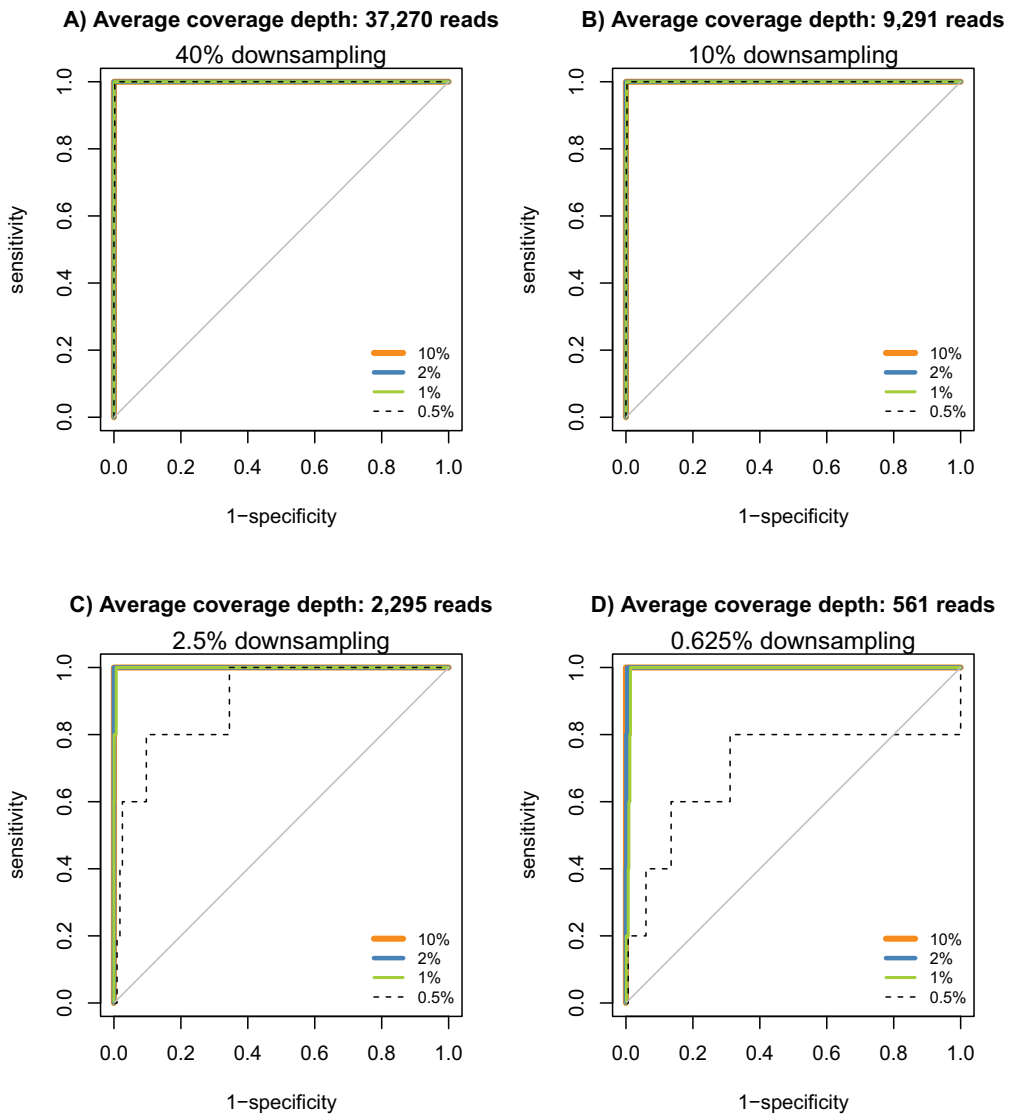

ROC curves for QQ-SNV with P50 variant frequency filtering on HCV plasmid mixture datasets (all paired-end reads) at different coverage depths by downsampling A) 40% B) 10% C) 2.5% and D) 0.625%.

Figure S18.  
 ROC curves for QQ-SNV with P75 variant frequency filtering  
 at different coverage depths

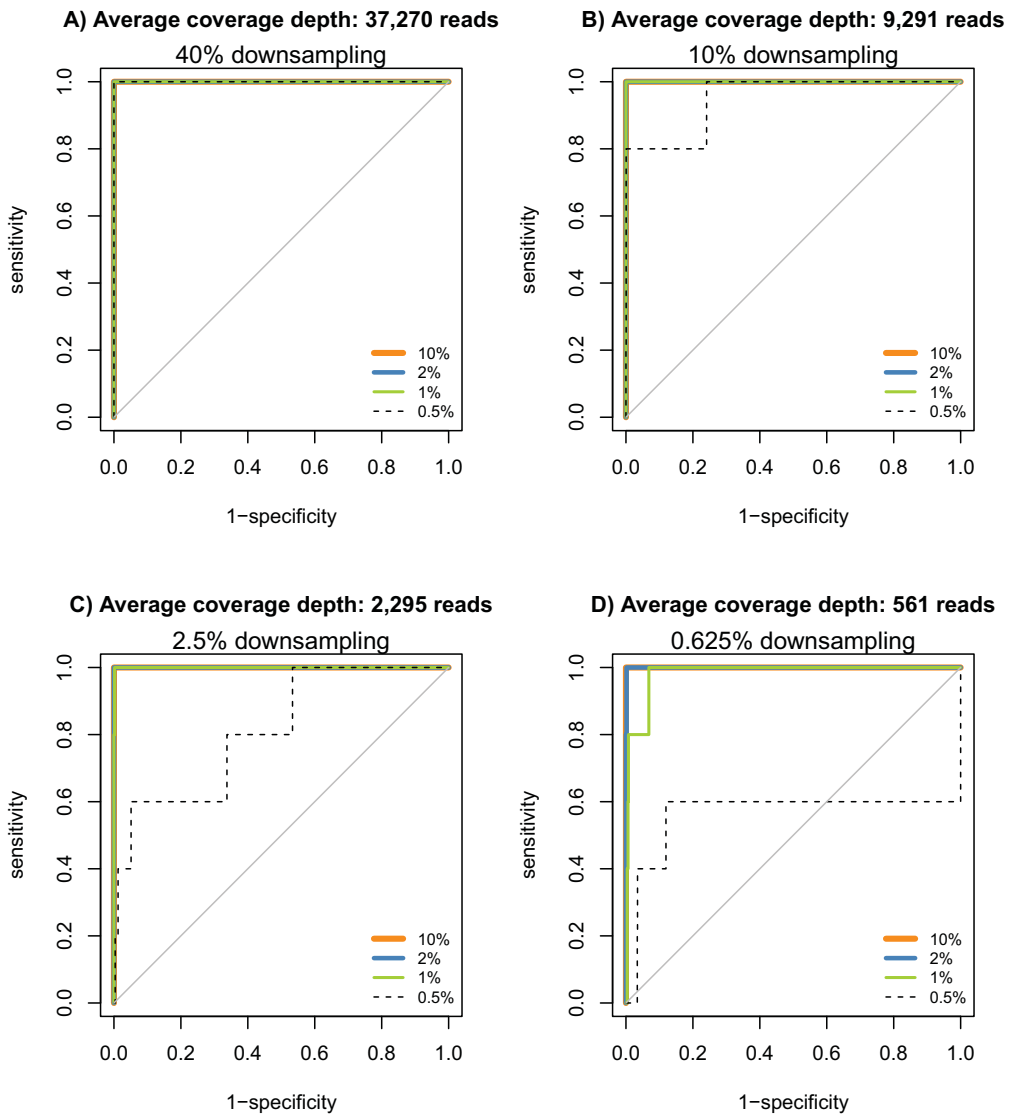

ROC curves for QQ-SNV with P75 variant frequency filtering on HCV plasmid mixture datasets (all paired-end reads) at different coverage depths by downsampling A) 40% B) 10% C) 2.5% and D) 0.625%.

Figure S19.  
 ROC curves for QQ-SNV with P80 variant frequency filtering  
 at different coverage depths

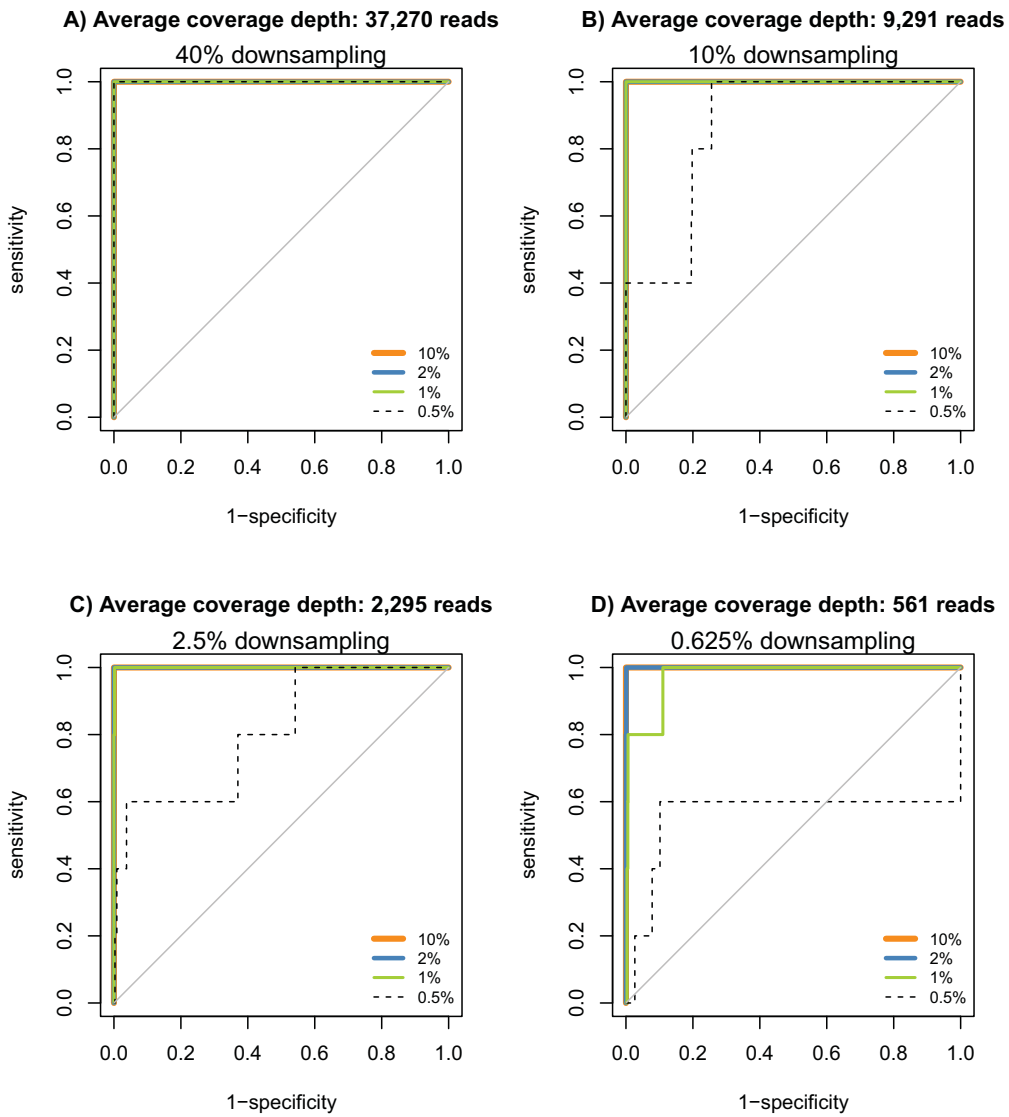

ROC curves for QQ-SNV with P80 variant frequency filtering on HCV plasmid mixture datasets (all paired-end reads) at different coverage depths by downsampling A) 40% B) 10% C) 2.5% and D) 0.625%.
