# Supplementary material for: QQ-SNV: single nucleotide variant detection at low frequency by comparing the quality quantiles
Source: PubMed Central journal article supplement (PMC4641353; doi:10.1186/s12859-015-0812-9), 2015-11-10
Supplement: 12859_2015_812_MOESM2_ESM.pdf [file 12859_2015_812_MOESM2_ESM.pdf]

**Table S1. Presence of SNVs in the HIV-1 PR-RT region of five plasmids (nucleotide position 2253-3749)**

| Sample   | Nucleotide position |      |      |      |      |      |      |      |      |      |      |      |
|----------|---------------------|------|------|------|------|------|------|------|------|------|------|------|
|          | 2259                | 2850 | 2852 | 2857 | 2858 | 2927 | 3048 | 3090 | 3091 | 3675 | 3677 | 3693 |
| HXB2     | G                   | A    | A    | A    | A    | G    | A    | T    | A    | A    | C    | A    |
| plasmid1 | A                   | .    | .    | .    | .    | A    | G    | .    | .    | .    | .    | .    |
| plasmid2 | A                   | C    | C    | G    | .    | A    | .    | .    | G    | .    | .    | .    |
| plasmid3 | A                   | .    | .    | .    | T    | A    | .    | G    | G    | .    | .    | .    |
| plasmid4 | A                   | .    | .    | .    | .    | A    | .    | .    | .    | T    | A    | .    |
| plasmid5 | A                   | .    | .    | .    | .    | A    | .    | .    | .    | .    | .    | G    |

**Table S2. Number of reads in the FASTQ/1 GAllx training data**

| Sample   | #reads forward | #reads reverse | Total     |
|----------|----------------|----------------|-----------|
| plasmid1 | 154,924        | 145,967        | 300,891   |
| plasmid2 | 56,891         | 57,653         | 114,544   |
| plasmid3 | 131,701        | 124,689        | 256,390   |
| plasmid4 | 129,642        | 128,343        | 257,985   |
| plasmid5 | 127,059        | 126,293        | 253,352   |
| Total    | 600,217        | 582,945        | 1,183,162 |

**Table S3. Number of nucleotides in the FASTQ/1 GAllx training data and PHRED quality score per plasmid**

| Sample   | Error <sup>a</sup> | No Error <sup>b</sup> | Total <sup>c</sup> | PHRED (-10Log <sub>10</sub> (P(error))) <sup>d</sup> |
|----------|--------------------|-----------------------|--------------------|------------------------------------------------------|
| plasmid1 | 30,666             | 14,747,350            | 14,778,016         | 26.83                                                |
| plasmid2 | 23,780             | 5,647,434             | 5,671,214          | 23.77                                                |
| plasmid3 | 79,993             | 12,630,905            | 12,710,898         | 22.01                                                |
| plasmid4 | 64,048             | 12,677,225            | 12,741,273         | 22.99                                                |
| plasmid5 | 67,526             | 12,475,449            | 12,542,975         | 22.69                                                |
| Total    | 266,013            | 58,178,363            | 58,444,376         | 23.42                                                |

<sup>a</sup>total number of nucleotide errors in the PR-RT region 2253-3749 per plasmid.

<sup>b</sup>total number of nucleotides without error in the PR-RT region 2253-3749 per plasmid.

<sup>c</sup>total number of nucleotides in the PR-RT region 2253-3749 per plasmid.

<sup>d</sup>PHRED quality score per plasmid.

**Table S4. Training performance of QQ-SNV on HIV-1 *in silico* plasmid mixture data (96 samples)**

| Variant % | QQ-SNV (default)                 |                                |
|-----------|----------------------------------|--------------------------------|
|           | with quality score recalibration | no quality score recalibration |
|           | sensitivity <sup>a</sup>         | sensitivity <sup>a</sup>       |
| 100.0%    | 100.0% (192/192)                 | 100.0% (192/192)               |
| 93.0%     | 100.0% (6/6)                     | 100.0% (6/6)                   |
| 68.0%     | 100.0% (6/6)                     | 100.0% (6/6)                   |
| 64.5%     | 100.0% (6/6)                     | 100.0% (6/6)                   |
| 63.5%     | 100.0% (6/6)                     | 100.0% (6/6)                   |
| 63.0%     | 100.0% (144/144)                 | 100.0% (144/144)               |
| 35.0%     | 100.0% (12/12)                   | 100.0% (12/12)                 |
| 31.5%     | 100.0% (12/12)                   | 100.0% (12/12)                 |
| 30.5%     | 100.0% (12/12)                   | 100.0% (12/12)                 |
| 30.0%     | 100.0% (180/180)                 | 100.0% (180/180)               |
| 6.5%      | 100.0% (12/12)                   | 100.0% (12/12)                 |
| 5.5%      | 100.0% (12/12)                   | 100.0% (12/12)                 |
| 5.0%      | 100.0% (180/180)                 | 100.0% (180/180)               |
| 2.0%      | 100.0% (12/12)                   | 100.0% (12/12)                 |
| 1.5%      | 100.0% (180/180)                 | 91.1% (164/180)                |
| 0.5%      | 95.0% (171/180)                  | 51.1% (92/180)                 |
| all       | 99.2% (1143/1152)                | 91.0% (1048/1152)              |

  

| QQ-SNV (default)                 | sensitivity <sup>a</sup> | specificity <sup>b</sup> | PPV <sup>c</sup> | FP <sup>d</sup> |
|----------------------------------|--------------------------|--------------------------|------------------|-----------------|
| with quality score recalibration | 99.2%                    | 99.9%                    | 75.0%            | 381             |
| no quality score recalibration   | 91.0%                    | 99.4%                    | 29.4%            | 2517            |

<sup>a</sup>sensitivity is the percentage of *true* variants that were correctly called as SNV.

<sup>b</sup>specificity is the percentage of variants correctly identified as errors.

<sup>c</sup>PPV is the percentage of variants called as SNV that were *true*.

<sup>d</sup>FP is the total number of variants incorrectly called as SNV in any of the 96 training samples.

**Table S5. Performance of QQ-SNV on HIV-1 *in silico* plasmid mixture data (ground set of 960 samples)**

| Variant %  | QQ-SNV <sub>D</sub> |                    | QQ-SNV <sub>HS</sub> |                    | QQ-SNV <sub>HS-P90</sub> <sup>a</sup> |                    | QQ-SNV <sub>HS-P75</sub> <sup>a</sup> |                    | QQ-SNV <sub>HS-P90</sub> <sup>a</sup> |                    |
|------------|---------------------|--------------------|----------------------|--------------------|---------------------------------------|--------------------|---------------------------------------|--------------------|---------------------------------------|--------------------|
|            | sens. <sup>b</sup>  | sens. <sup>b</sup> | sens. <sup>b</sup>   | sens. <sup>b</sup> | sens. <sup>b</sup>                    | sens. <sup>b</sup> | sens. <sup>b</sup>                    | sens. <sup>b</sup> | sens. <sup>b</sup>                    | sens. <sup>b</sup> |
| <0.5%      | 96.3%               | 100%               | 100%                 | 100%               | 100%                                  | 100%               | 100%                                  | 100%               | 100%                                  | 99.7%              |
| 0.5% - <1% | 98.0%               | 100%               | 100%                 | 100%               | 100%                                  | 100%               | 100%                                  | 100%               | 100%                                  | 100%               |
| 1% - <1.5% | 100%                | 100%               | 100%                 | 100%               | 100%                                  | 100%               | 100%                                  | 100%               | 100%                                  | 100%               |
| 1.5% - <2% | 100%                | 100%               | 100%                 | 100%               | 100%                                  | 100%               | 100%                                  | 100%               | 100%                                  | 100%               |
| 2% - <5%   | 100%                | 100%               | 100%                 | 100%               | 100%                                  | 100%               | 100%                                  | 100%               | 100%                                  | 100%               |
| 5% - <10%  | 100%                | 100%               | 100%                 | 100%               | 100%                                  | 100%               | 100%                                  | 100%               | 100%                                  | 100%               |
| 10% - <50% | 100%                | 100%               | 100%                 | 100%               | 100%                                  | 100%               | 100%                                  | 100%               | 100%                                  | 100%               |
| ≥50%       | 100%                | 100%               | 100%                 | 100%               | 100%                                  | 100%               | 100%                                  | 100%               | 100%                                  | 100%               |
|            | spec. <sup>c</sup>  | spec. <sup>c</sup> | spec. <sup>c</sup>   | spec. <sup>c</sup> | spec. <sup>c</sup>                    | spec. <sup>c</sup> | spec. <sup>c</sup>                    | spec. <sup>c</sup> | spec. <sup>c</sup>                    | spec. <sup>c</sup> |
|            | 98.9%               | 85.6%              | 88.3%                | 88.3%              | 90.6%                                 | 90.6%              | 90.6%                                 | 90.6%              | 90.6%                                 | 93.9%              |
|            | PPV <sup>d</sup>    | PPV <sup>d</sup>   | PPV <sup>d</sup>     | PPV <sup>d</sup>   | PPV <sup>d</sup>                      | PPV <sup>d</sup>   | PPV <sup>d</sup>                      | PPV <sup>d</sup>   | PPV <sup>d</sup>                      | PPV <sup>d</sup>   |
|            | 19.6%               | 1.82%              | 2.24%                | 2.24%              | 2.77%                                 | 2.77%              | 2.77%                                 | 2.77%              | 2.77%                                 | 4.19%              |
|            | FP <sup>e</sup>     | FP <sup>e</sup>    | FP <sup>e</sup>      | FP <sup>e</sup>    | FP <sup>e</sup>                       | FP <sup>e</sup>    | FP <sup>e</sup>                       | FP <sup>e</sup>    | FP <sup>e</sup>                       | FP <sup>e</sup>    |
|            | 46954               | 621146             | 503284               | 503284             | 404489                                | 404489             | 404489                                | 404489             | 404489                                | 263047             |

<sup>a</sup>50<sup>th</sup>/75<sup>th</sup>/90<sup>th</sup> percentile of the QQ-SNV<sub>HS</sub> "error" distribution was used as frequency cutoff to decrease the number of false positives obtained with QQ-SNV<sub>HS</sub>.

<sup>b</sup>sens. is the percentage of *true* variants that were correctly called as SNV.

<sup>c</sup>spec. is the percentage of variants correctly identified as errors.

<sup>d</sup>PPV is the percentage of variants called as SNV that were *true*.

<sup>e</sup>FP is the total number of variants incorrectly called as SNV in any of the 960 samples.

**Table S6. Performance of QQ-SNV on HIV plasmid mixture dataset 1**

| Variant % | QQ-SNV <sub>D</sub> |                    | QQ-SNV <sub>HS</sub> |                    | QQ-SNV <sub>HS</sub> <sup>a</sup> <sub>P50</sub> |                    | QQ-SNV <sub>HS</sub> <sup>a</sup> <sub>P75</sub> |                    | QQ-SNV <sub>HS</sub> <sup>a</sup> <sub>P80</sub> |                    | QQ-SNV <sub>HS</sub> <sup>a</sup> <sub>P85</sub> |                    | QQ-SNV <sub>HS</sub> <sup>a</sup> <sub>P90</sub> |                    | QQ-SNV <sub>HS</sub> <sup>a</sup> <sub>P95</sub> |                    |                    |
|-----------|---------------------|--------------------|----------------------|--------------------|--------------------------------------------------|--------------------|--------------------------------------------------|--------------------|--------------------------------------------------|--------------------|--------------------------------------------------|--------------------|--------------------------------------------------|--------------------|--------------------------------------------------|--------------------|--------------------|
|           | sens. <sup>b</sup>  | sens. <sup>b</sup> | sens. <sup>b</sup>   | sens. <sup>b</sup> | sens. <sup>b</sup>                               | sens. <sup>b</sup> | sens. <sup>b</sup>                               | sens. <sup>b</sup> | sens. <sup>b</sup>                               | sens. <sup>b</sup> | sens. <sup>b</sup>                               | sens. <sup>b</sup> | sens. <sup>b</sup>                               | sens. <sup>b</sup> | sens. <sup>b</sup>                               | sens. <sup>b</sup> | sens. <sup>b</sup> |
| 88.889%   | 57/61               | 60/61              | 60/61                | 60/61              | 60/61                                            | 60/61              | 60/61                                            | 60/61              | 60/61                                            | 60/61              | 60/61                                            | 60/61              | 60/61                                            | 60/61              | 60/61                                            | 60/61              | 60/61              |
| 10%       | 44/50               | 49/50              | 49/50                | 49/50              | 49/50                                            | 49/50              | 49/50                                            | 49/50              | 49/50                                            | 49/50              | 49/50                                            | 49/50              | 49/50                                            | 49/50              | 49/50                                            | 49/50              | 48/50              |
| 1%        | 28/34               | 30/34              | 30/34                | 30/34              | 30/34                                            | 30/34              | 30/34                                            | 30/34              | 30/34                                            | 30/34              | 30/34                                            | 30/34              | 30/34                                            | 30/34              | 30/34                                            | 30/34              | 29/34              |
| 0.1%      | 2/42                | 23/42              | 23/42                | 23/42              | 23/42                                            | 23/42              | 23/42                                            | 23/42              | 20/42                                            | 20/42              | 18/42                                            | 18/42              | 10/42                                            | 10/42              | 10/42                                            | 3/42               | 3/42               |
| 0.01%     | 0/40                | 6/40               | 6/40                 | 4/40               | 1/40                                             | 1/40               | 1/40                                             | 1/40               | 1/40                                             | 1/40               | 0/40                                             | 0/40               | 0/40                                             | 0/40               | 0/40                                             | 0/40               | 0/40               |
| 0.001%    | 0/30                | 0/30               | 0/30                 | 0/30               | 0/30                                             | 0/30               | 0/30                                             | 0/30               | 0/30                                             | 0/30               | 0/30                                             | 0/30               | 0/30                                             | 0/30               | 0/30                                             | 0/30               | 0/30               |
|           | FP <sup>c</sup>     | FP <sup>c</sup>    | FP <sup>c</sup>      | FP <sup>c</sup>    | FP <sup>c</sup>                                  | FP <sup>c</sup>    | FP <sup>c</sup>                                  | FP <sup>c</sup>    | FP <sup>c</sup>                                  | FP <sup>c</sup>    | FP <sup>c</sup>                                  | FP <sup>c</sup>    | FP <sup>c</sup>                                  | FP <sup>c</sup>    | FP <sup>c</sup>                                  | FP <sup>c</sup>    | FP <sup>c</sup>    |
|           | 2                   | 51                 | 21                   | 7                  | 4                                                | 1                  | 4                                                | 1                  | 1                                                | 1                  | 1                                                | 1                  | 1                                                | 1                  | 1                                                | 1                  | 1                  |
|           | time <sup>de</sup>  | time <sup>de</sup> | time <sup>de</sup>   | time <sup>de</sup> | time <sup>de</sup>                               | time <sup>de</sup> | time <sup>de</sup>                               | time <sup>de</sup> | time <sup>de</sup>                               | time <sup>de</sup> | time <sup>de</sup>                               | time <sup>de</sup> | time <sup>de</sup>                               | time <sup>de</sup> | time <sup>de</sup>                               | time <sup>de</sup> | time <sup>de</sup> |
|           | 14m11s              | 14m11s             | 14m11s               | 14m11s             | 14m11s                                           | 14m11s             | 14m11s                                           | 14m11s             | 14m11s                                           | 14m11s             | 14m11s                                           | 14m11s             | 14m11s                                           | 14m11s             | 14m11s                                           | 14m11s             | 14m11s             |

<sup>a</sup>50<sup>th</sup>/75<sup>th</sup>/80<sup>th</sup>/85<sup>th</sup>/90<sup>th</sup>/95<sup>th</sup> percentile of the QQ-SNV<sub>HS</sub> distribution of “error” frequencies was used as frequency cutoff to decrease the number of false positives obtained with QQ-SNV<sub>HS</sub>.  
<sup>b</sup>sens. is the percentage of *true* variants that were correctly called as SNV.  
<sup>c</sup>FP is the number of variants incorrectly called as SNV.  
<sup>d</sup>computation time in minutes (m) and seconds (s).  
<sup>e</sup>Windows 7 64bit, 8GB RAM, 3.2GHz

**Table S7. Performance of QQ-SNV on HIV plasmid mixture dataset 2**

| Variant % | QQ-SNV <sub>b</sub> |                    | QQ-SNV <sub>HS</sub> |                    | QQ-SNV <sub>HS-P90</sub> <sup>a</sup> |                    | QQ-SNV <sub>HS-P75</sub> <sup>a</sup> |                    | QQ-SNV <sub>HS-P80</sub> <sup>a</sup> |                    | QQ-SNV <sub>HS-P85</sub> <sup>a</sup> |                    | QQ-SNV <sub>HS-P90</sub> <sup>a</sup> |                    | QQ-SNV <sub>HS-P95</sub> <sup>a</sup> |                    |
|-----------|---------------------|--------------------|----------------------|--------------------|---------------------------------------|--------------------|---------------------------------------|--------------------|---------------------------------------|--------------------|---------------------------------------|--------------------|---------------------------------------|--------------------|---------------------------------------|--------------------|
|           | sens. <sup>b</sup>  | sens. <sup>b</sup> | sens. <sup>b</sup>   | sens. <sup>b</sup> | sens. <sup>b</sup>                    | sens. <sup>b</sup> | sens. <sup>b</sup>                    | sens. <sup>b</sup> | sens. <sup>b</sup>                    | sens. <sup>b</sup> | sens. <sup>b</sup>                    | sens. <sup>b</sup> | sens. <sup>b</sup>                    | sens. <sup>b</sup> | sens. <sup>b</sup>                    | sens. <sup>b</sup> |
| 40.0%     | 2/2                 | 2/2                | 2/2                  | 2/2                | 2/2                                   | 2/2                | 2/2                                   | 2/2                | 2/2                                   | 2/2                | 2/2                                   | 2/2                | 2/2                                   | 2/2                | 2/2                                   | 2/2                |
| 39.9%     | 1/1                 | 1/1                | 1/1                  | 1/1                | 1/1                                   | 1/1                | 1/1                                   | 1/1                | 1/1                                   | 1/1                | 1/1                                   | 1/1                | 1/1                                   | 1/1                | 1/1                                   | 1/1                |
| 39.5%     | 1/1                 | 1/1                | 1/1                  | 1/1                | 1/1                                   | 1/1                | 1/1                                   | 1/1                | 1/1                                   | 1/1                | 1/1                                   | 1/1                | 1/1                                   | 1/1                | 1/1                                   | 1/1                |
| 38.9%     | 1/1                 | 1/1                | 1/1                  | 1/1                | 1/1                                   | 1/1                | 1/1                                   | 1/1                | 1/1                                   | 1/1                | 1/1                                   | 1/1                | 1/1                                   | 1/1                | 1/1                                   | 1/1                |
| 38.4%     | 2/2                 | 2/2                | 2/2                  | 2/2                | 2/2                                   | 2/2                | 2/2                                   | 2/2                | 2/2                                   | 2/2                | 2/2                                   | 2/2                | 2/2                                   | 2/2                | 2/2                                   | 2/2                |
| 34.4%     | 2/2                 | 2/2                | 2/2                  | 2/2                | 2/2                                   | 2/2                | 2/2                                   | 2/2                | 2/2                                   | 2/2                | 2/2                                   | 2/2                | 2/2                                   | 2/2                | 2/2                                   | 2/2                |
| 34.0%     | 1/1                 | 1/1                | 1/1                  | 1/1                | 1/1                                   | 1/1                | 1/1                                   | 1/1                | 1/1                                   | 1/1                | 1/1                                   | 1/1                | 1/1                                   | 1/1                | 1/1                                   | 1/1                |
| 33.5%     | 1/1                 | 1/1                | 1/1                  | 1/1                | 1/1                                   | 1/1                | 1/1                                   | 1/1                | 1/1                                   | 1/1                | 1/1                                   | 1/1                | 1/1                                   | 1/1                | 1/1                                   | 1/1                |
| 33.4%     | 8/8                 | 8/8                | 8/8                  | 8/8                | 8/8                                   | 8/8                | 8/8                                   | 8/8                | 8/8                                   | 8/8                | 8/8                                   | 8/8                | 8/8                                   | 8/8                | 8/8                                   | 8/8                |
| 6.6%      | 1/1                 | 1/1                | 1/1                  | 1/1                | 1/1                                   | 1/1                | 1/1                                   | 1/1                | 1/1                                   | 1/1                | 1/1                                   | 1/1                | 1/1                                   | 1/1                | 1/1                                   | 1/1                |
| 6.1%      | 1/1                 | 1/1                | 1/1                  | 1/1                | 1/1                                   | 1/1                | 1/1                                   | 1/1                | 1/1                                   | 1/1                | 1/1                                   | 1/1                | 1/1                                   | 1/1                | 1/1                                   | 1/1                |
| 5.1%      | 1/1                 | 1/1                | 1/1                  | 1/1                | 1/1                                   | 1/1                | 1/1                                   | 1/1                | 1/1                                   | 1/1                | 1/1                                   | 1/1                | 1/1                                   | 1/1                | 1/1                                   | 1/1                |
| 5.0%      | 8/8                 | 8/8                | 8/8                  | 8/8                | 8/8                                   | 8/8                | 8/8                                   | 8/8                | 8/8                                   | 8/8                | 8/8                                   | 8/8                | 8/8                                   | 8/8                | 8/8                                   | 8/8                |
| 1.0%      | 10/10               | 10/10              | 10/10                | 10/10              | 10/10                                 | 10/10              | 10/10                                 | 10/10              | 10/10                                 | 10/10              | 10/10                                 | 10/10              | 10/10                                 | 10/10              | 10/10                                 | 10/10              |
| 0.6%      | 0/1                 | 1/1                | 1/1                  | 1/1                | 1/1                                   | 1/1                | 1/1                                   | 1/1                | 1/1                                   | 1/1                | 1/1                                   | 1/1                | 1/1                                   | 1/1                | 1/1                                   | 1/1                |
| 0.5%      | 5/8                 | 8/8                | 8/8                  | 8/8                | 8/8                                   | 8/8                | 8/8                                   | 8/8                | 8/8                                   | 8/8                | 8/8                                   | 8/8                | 8/8                                   | 8/8                | 8/8                                   | 8/8                |
| 0.1%      | 1/10                | 6/10               | 6/10                 | 6/10               | 6/10                                  | 6/10               | 6/10                                  | 6/10               | 6/10                                  | 6/10               | 6/10                                  | 6/10               | 6/10                                  | 6/10               | 6/10                                  | 6/10               |
|           | FP <sup>c</sup>     | FP <sup>c</sup>    | FP <sup>c</sup>      | FP <sup>c</sup>    | FP <sup>c</sup>                       | FP <sup>c</sup>    | FP <sup>c</sup>                       | FP <sup>c</sup>    | FP <sup>c</sup>                       | FP <sup>c</sup>    | FP <sup>c</sup>                       | FP <sup>c</sup>    | FP <sup>c</sup>                       | FP <sup>c</sup>    | FP <sup>c</sup>                       | FP <sup>c</sup>    |
|           | 0                   | 1                  | 1                    | 1                  | 1                                     | 1                  | 1                                     | 1                  | 1                                     | 1                  | 1                                     | 1                  | 1                                     | 1                  | 1                                     | 1                  |
|           | time <sup>de</sup>  | time <sup>de</sup> | time <sup>de</sup>   | time <sup>de</sup> | time <sup>de</sup>                    | time <sup>de</sup> | time <sup>de</sup>                    | time <sup>de</sup> | time <sup>de</sup>                    | time <sup>de</sup> | time <sup>de</sup>                    | time <sup>de</sup> | time <sup>de</sup>                    | time <sup>de</sup> | time <sup>de</sup>                    | time <sup>de</sup> |
|           | 2h28m43s            | 2h28m43s           | 2h28m43s             | 2h28m43s           | 2h28m43s                              | 2h28m43s           | 2h28m43s                              | 2h28m43s           | 2h28m43s                              | 2h28m43s           | 2h28m43s                              | 2h28m43s           | 2h28m43s                              | 2h28m43s           | 2h28m43s                              | 2h28m43s           |

<sup>a</sup>50<sup>th</sup>/75<sup>th</sup>/80<sup>th</sup>/85<sup>th</sup>/90<sup>th</sup>/95<sup>th</sup> percentile of the QQ-SNV<sub>HS</sub> distribution of "error" frequencies was used as frequency cutoff to decrease the number of false positives obtained with QQ-SNV<sub>HS</sub>.

<sup>b</sup>sens. is the percentage of true variants that were correctly called as SNV.

<sup>c</sup>FP is the number of variants incorrectly called as SNV.

<sup>d</sup>computation time in hours (h), minutes (m) and seconds (s).

<sup>e</sup>Windows 7 64bit, 8GB RAM, 3.2GHz.

**Table S8. Performance of QQ-SNV on HCV plasmid mixture datasets**

| Variant % | Pair             | QQ-SNV <sub>D</sub> |                 |                    | QQ-SNV <sub>HS</sub> |                 |                    | QQ-SNV <sub>HS-P50</sub> <sup>a</sup> |                 |                    | QQ-SNV <sub>HS-P75</sub> <sup>a</sup> |                 |                    |
|-----------|------------------|---------------------|-----------------|--------------------|----------------------|-----------------|--------------------|---------------------------------------|-----------------|--------------------|---------------------------------------|-----------------|--------------------|
|           |                  | sens. <sup>b</sup>  | FP <sup>c</sup> | time <sup>gh</sup> | sens. <sup>b</sup>   | FP <sup>c</sup> | time <sup>gh</sup> | sens. <sup>b</sup>                    | FP <sup>c</sup> | time <sup>gh</sup> | sens. <sup>b</sup>                    | FP <sup>c</sup> | time <sup>gh</sup> |
| 0.50%     | 1 <sup>d</sup>   | 5/5                 | 10              | 2m27s              | 5/5                  | 112             | 2m27s              | 5/5                                   | 68              | 2m27s              | 5/5                                   | 46              | 2m27s              |
| 0.50%     | 2 <sup>e</sup>   | 0/5                 | 0               | 2m18s              | 4/5                  | 3               | 2m18s              | 4/5                                   | 0               | 2m18s              | 0/5                                   | 0               | 2m18s              |
| 0.50%     | 1+2 <sup>f</sup> | 1/5                 | 0               | 4m42s              | 5/5                  | 12              | 4m42s              | 5/5                                   | 4               | 4m42s              | 5/5                                   | 0               | 4m42s              |
| 1%        | 1 <sup>d</sup>   | 5/5                 | 11              | 2m56s              | 5/5                  | 122             | 2m56s              | 5/5                                   | 78              | 2m56s              | 5/5                                   | 59              | 2m56s              |
| 1%        | 2 <sup>e</sup>   | 1/5                 | 0               | 3m1s               | 5/5                  | 5               | 3m1s               | 5/5                                   | 0               | 3m1s               | 5/5                                   | 0               | 3m1s               |
| 1%        | 1+2 <sup>f</sup> | 3/5                 | 1               | 5m48s              | 5/5                  | 14              | 5m48s              | 5/5                                   | 2               | 5m48s              | 5/5                                   | 0               | 5m48s              |
| 2%        | 1 <sup>d</sup>   | 5/5                 | 13              | 2m35s              | 5/5                  | 146             | 2m35s              | 5/5                                   | 100             | 2m35s              | 5/5                                   | 70              | 2m35s              |
| 2%        | 2 <sup>e</sup>   | 3/5                 | 0               | 2m32s              | 5/5                  | 5               | 2m32s              | 5/5                                   | 0               | 2m32s              | 5/5                                   | 0               | 2m32s              |
| 2%        | 1+2 <sup>f</sup> | 5/5                 | 0               | 4m59s              | 5/5                  | 14              | 4m59s              | 5/5                                   | 3               | 4m59s              | 5/5                                   | 0               | 4m59s              |
| 10%       | 1 <sup>d</sup>   | 5/5                 | 6               | 3m5s               | 5/5                  | 112             | 3m5s               | 5/5                                   | 71              | 3m5s               | 5/5                                   | 49              | 3m5s               |
| 10%       | 2 <sup>e</sup>   | 5/5                 | 0               | 2m30s              | 5/5                  | 5               | 2m30s              | 5/5                                   | 1               | 2m30s              | 5/5                                   | 0               | 2m30s              |
| 10%       | 1+2 <sup>f</sup> | 5/5                 | 0               | 5m29s              | 5/5                  | 7               | 5m29s              | 5/5                                   | 2               | 5m29s              | 5/5                                   | 0               | 5m29s              |

  

| Variant % | Pair             | QQ-SNV <sub>HS-P80</sub> <sup>a</sup> |                 |                    | QQ-SNV <sub>HS-P85</sub> <sup>a</sup> |                 |                    | QQ-SNV <sub>HS-P90</sub> <sup>a</sup> |                 |                    | QQ-SNV <sub>HS-P95</sub> <sup>a</sup> |                 |                    |
|-----------|------------------|---------------------------------------|-----------------|--------------------|---------------------------------------|-----------------|--------------------|---------------------------------------|-----------------|--------------------|---------------------------------------|-----------------|--------------------|
|           |                  | sens. <sup>b</sup>                    | FP <sup>c</sup> | time <sup>gh</sup> | sens. <sup>b</sup>                    | FP <sup>c</sup> | time <sup>gh</sup> | sens. <sup>b</sup>                    | FP <sup>c</sup> | time <sup>gh</sup> | sens. <sup>b</sup>                    | FP <sup>c</sup> | time <sup>gh</sup> |
| 0.50%     | 1 <sup>d</sup>   | 5/5                                   | 38              | 2m27s              | 5/5                                   | 29              | 2m27s              | 5/5                                   | 17              | 2m27s              | 5/5                                   | 8               | 2m27s              |
| 0.50%     | 2 <sup>e</sup>   | 0/5                                   | 0               | 2m18s              | 0/5                                   | 0               | 2m18s              | 0/5                                   | 0               | 2m18s              | 0/5                                   | 0               | 2m18s              |
| 0.50%     | 1+2 <sup>f</sup> | 5/5                                   | 0               | 4m42s              | 3/5                                   | 0               | 4m42s              | 1/5                                   | 0               | 4m42s              | 1/5                                   | 0               | 4m42s              |
| 1%        | 1 <sup>d</sup>   | 5/5                                   | 53              | 2m56s              | 5/5                                   | 47              | 2m56s              | 5/5                                   | 33              | 2m56s              | 5/5                                   | 10              | 2m56s              |
| 1%        | 2 <sup>e</sup>   | 5/5                                   | 0               | 3m1s               | 5/5                                   | 0               | 3m1s               | 3/5                                   | 0               | 3m1s               | 1/5                                   | 0               | 3m1s               |
| 1%        | 1+2 <sup>f</sup> | 5/5                                   | 0               | 5m48s              | 5/5                                   | 0               | 5m48s              | 5/5                                   | 0               | 5m48s              | 5/5                                   | 0               | 5m48s              |
| 2%        | 1 <sup>d</sup>   | 5/5                                   | 64              | 2m35s              | 5/5                                   | 55              | 2m35s              | 5/5                                   | 34              | 2m35s              | 5/5                                   | 15              | 2m35s              |
| 2%        | 2 <sup>e</sup>   | 5/5                                   | 0               | 2m32s              | 5/5                                   | 0               | 2m32s              | 5/5                                   | 0               | 2m32s              | 5/5                                   | 0               | 2m32s              |
| 2%        | 1+2 <sup>f</sup> | 5/5                                   | 0               | 4m59s              | 5/5                                   | 0               | 4m59s              | 5/5                                   | 0               | 4m59s              | 5/5                                   | 0               | 4m59s              |
| 10%       | 1 <sup>d</sup>   | 5/5                                   | 42              | 3m5s               | 5/5                                   | 29              | 3m5s               | 5/5                                   | 18              | 3m5s               | 5/5                                   | 9               | 3m5s               |
| 10%       | 2 <sup>e</sup>   | 5/5                                   | 0               | 2m30s              | 5/5                                   | 0               | 2m30s              | 5/5                                   | 0               | 2m30s              | 5/5                                   | 0               | 2m30s              |
| 10%       | 1+2 <sup>f</sup> | 5/5                                   | 0               | 5m29s              | 5/5                                   | 0               | 5m29s              | 5/5                                   | 0               | 5m29s              | 5/5                                   | 0               | 5m29s              |

<sup>a</sup>50<sup>th</sup>/75<sup>th</sup>/80<sup>th</sup>/85<sup>th</sup>/90<sup>th</sup>/95<sup>th</sup> percentile of the QQ-SNV<sub>HS</sub> distribution of “error” frequencies was used as frequency cutoff to decrease the number of false positives obtained with QQ-SNV<sub>HS</sub>.

<sup>b</sup>sens. is the percentage of *true* variants that were correctly called as SNV.

<sup>c</sup>FP is the number of variants incorrectly called as SNV.

<sup>d</sup>Reads 1 of paired-end reads.

<sup>e</sup>Reads 2 of paired-end reads (sequenced after paired-end turn).

<sup>f</sup>All paired-end reads.

<sup>g</sup>computation time in minutes (m) and seconds (s).

<sup>h</sup>Windows 7 64 bit, 8GB RAM, 3.2GHz.

**Table S9. Performance at different coverage depths on HCV plasmid mixture datasets (all paired-end reads)**

| Downsampling | Variant % | Average coverage depth (number of reads) | QQ-SNV <sub>D</sub> |                 | QQ-SNV <sub>HS</sub> |                 | QQ-SNV <sub>HS-P50</sub> <sup>a</sup> |                 | QQ-SNV <sub>HS-P75</sub> <sup>a</sup> |                 |
|--------------|-----------|------------------------------------------|---------------------|-----------------|----------------------|-----------------|---------------------------------------|-----------------|---------------------------------------|-----------------|
|              |           |                                          | sens. <sup>b</sup>  | FP <sup>c</sup> | sens. <sup>b</sup>   | FP <sup>c</sup> | sens. <sup>b</sup>                    | FP <sup>c</sup> | sens. <sup>b</sup>                    | FP <sup>c</sup> |
| 40%          | 0.50%     | 32,641                                   | 1/5                 | 0               | 5/5                  | 15              | 5/5                                   | 5               | 5/5                                   | 0               |
| 40%          | 1%        | 41,691                                   | 3/5                 | 1               | 5/5                  | 14              | 5/5                                   | 2               | 5/5                                   | 0               |
| 40%          | 2%        | 35,202                                   | 5/5                 | 0               | 5/5                  | 16              | 5/5                                   | 3               | 5/5                                   | 0               |
| 40%          | 10%       | 39,544                                   | 5/5                 | 0               | 5/5                  | 9               | 5/5                                   | 2               | 5/5                                   | 0               |
| 10%          | 0.50%     | 8,142                                    | 0/5                 | 0               | 5/5                  | 30              | 5/5                                   | 9               | 4/5                                   | 1               |
| 10%          | 1%        | 10,391                                   | 4/5                 | 1               | 5/5                  | 24              | 5/5                                   | 4               | 5/5                                   | 0               |
| 10%          | 2%        | 8,777                                    | 5/5                 | 1               | 5/5                  | 35              | 5/5                                   | 8               | 5/5                                   | 3               |
| 10%          | 10%       | 9,856                                    | 5/5                 | 0               | 5/5                  | 19              | 5/5                                   | 5               | 5/5                                   | 1               |
| 2.5%         | 0.50%     | 2,012                                    | 0/5                 | 5               | 1/5                  | 34              | 1/5                                   | 19              | 1/5                                   | 7               |
| 2.5%         | 1%        | 2,568                                    | 3/5                 | 4               | 5/5                  | 31              | 5/5                                   | 11              | 5/5                                   | 3               |
| 2.5%         | 2%        | 2,167                                    | 5/5                 | 5               | 5/5                  | 34              | 5/5                                   | 14              | 5/5                                   | 6               |
| 2.5%         | 10%       | 2,434                                    | 5/5                 | 2               | 5/5                  | 23              | 5/5                                   | 7               | 5/5                                   | 5               |
| 0.625%       | 0.50%     | 490                                      | 1/5                 | 9               | 2/5                  | 21              | 0/5                                   | 2               | 0/5                                   | 1               |
| 0.625%       | 1%        | 631                                      | 1/5                 | 21              | 3/5                  | 39              | 3/5                                   | 14              | 2/5                                   | 6               |
| 0.625%       | 2%        | 527                                      | 4/5                 | 12              | 5/5                  | 23              | 5/5                                   | 7               | 5/5                                   | 3               |
| 0.625%       | 10%       | 595                                      | 5/5                 | 7               | 5/5                  | 22              | 5/5                                   | 4               | 5/5                                   | 3               |

  

| Downsampling | Variant % | Average coverage depth (number of reads) | QQ-SNV <sub>HS-P80</sub> <sup>a</sup> |                 | LoFreq             |                 | ShoRAH             |                 | V-Phaser 2         |                 |
|--------------|-----------|------------------------------------------|---------------------------------------|-----------------|--------------------|-----------------|--------------------|-----------------|--------------------|-----------------|
|              |           |                                          | sens. <sup>b</sup>                    | FP <sup>c</sup> | sens. <sup>b</sup> | FP <sup>c</sup> | sens. <sup>b</sup> | FP <sup>c</sup> | sens. <sup>b</sup> | FP <sup>c</sup> |
| 40%          | 0.50%     | 32,641                                   | 5/5                                   | 0               | 1/5                | 2               | 4/5                | 0               | 4/5                | 0               |
| 40%          | 1%        | 41,691                                   | 5/5                                   | 0               | 5/5                | 3               | 5/5                | 0               | 3/5                | 2               |
| 40%          | 2%        | 35,202                                   | 5/5                                   | 0               | 5/5                | 3               | 5/5                | 1               | 4/5                | 2               |
| 40%          | 10%       | 39,544                                   | 5/5                                   | 0               | 5/5                | 7               | 5/5                | 1               | 2/5                | 4               |
| 10%          | 0.50%     | 8,142                                    | 2/5                                   | 0               | 0/5                | 0               | 5/5                | 0               | 3/5                | 0               |
| 10%          | 1%        | 10,391                                   | 5/5                                   | 0               | 5/5                | 2               | 5/5                | 0               | 3/5                | 0               |
| 10%          | 2%        | 8,777                                    | 5/5                                   | 3               | 5/5                | 0               | 5/5                | 0               | 4/5                | 0               |
| 10%          | 10%       | 9,856                                    | 5/5                                   | 1               | 5/5                | 2               | 5/5                | 1               | 5/5                | 0               |
| 2.5%         | 0.50%     | 2,012                                    | 1/5                                   | 5               | 0/5                | 0               | 0/5                | 0               | 2/5                | 0               |
| 2.5%         | 1%        | 2,568                                    | 5/5                                   | 3               | 2/5                | 0               | 5/5                | 0               | 5/5                | 0               |
| 2.5%         | 2%        | 2,167                                    | 5/5                                   | 6               | 5/5                | 0               | 5/5                | 0               | 5/5                | 0               |
| 2.5%         | 10%       | 2,434                                    | 5/5                                   | 3               | 5/5                | 1               | 5/5                | 0               | 5/5                | 0               |
| 0.625%       | 0.50%     | 490                                      | 0/5                                   | 1               | 0/5                | 0               | 0/5                | 0               | 0/5                | 0               |
| 0.625%       | 1%        | 631                                      | 2/5                                   | 5               | 0/5                | 0               | 0/5                | 0               | 2/5                | 0               |
| 0.625%       | 2%        | 527                                      | 5/5                                   | 2               | 3/5                | 0               | 5/5                | 0               | 5/5                | 0               |
| 0.625%       | 10%       | 595                                      | 5/5                                   | 2               | 5/5                | 0               | 5/5                | 0               | 5/5                | 0               |

<sup>a</sup>50<sup>th</sup>/75<sup>th</sup>/80<sup>th</sup> percentile of the QQ-SNV<sub>HS</sub> distribution of “error” frequencies was used as frequency cutoff to decrease the number of false positives obtained with QQ-SNV<sub>HS</sub>.

<sup>b</sup>sens. is the percentage of *true* variants that were correctly called as SNV.

<sup>c</sup>FP is the number of variants incorrectly called as SNV.

**Table S10. Performance of QQ-SNV on H1N1 clinical sample**

|       | QQ-SNV <sub>D</sub> |                    |                 | QQ-SNV <sub>HS</sub> |                    |                 | QQ-SNV <sub>HS-P50</sub> <sup>a</sup> |                    |                 | QQ-SNV <sub>HS-P75</sub> <sup>a</sup> |                    |                 |                    |
|-------|---------------------|--------------------|-----------------|----------------------|--------------------|-----------------|---------------------------------------|--------------------|-----------------|---------------------------------------|--------------------|-----------------|--------------------|
|       | Pair                | sens. <sup>b</sup> | FP <sup>c</sup> | time <sup>gh</sup>   | sens. <sup>b</sup> | FP <sup>c</sup> | time <sup>gh</sup>                    | sens. <sup>b</sup> | FP <sup>c</sup> | time <sup>gh</sup>                    | sens. <sup>b</sup> | FP <sup>c</sup> | time <sup>gh</sup> |
| GAllx | 1 <sup>d</sup>      | 0/4                | 0               | 12m51s               | 4/4                | 2               | 12m51s                                | 4/4                | 2               | 12m51s                                | 4/4                | 2               | 12m51s             |
| GAllx | 2 <sup>e</sup>      | 0/4                | 0               | 13m5s                | 4/4                | 1               | 13m5s                                 | 4/4                | 1               | 13m5s                                 | 4/4                | 1               | 13m5s              |
| GAllx | 1+2 <sup>f</sup>    | 0/4                | 0               | 21m56s               | 4/4                | 4               | 21m56s                                | 4/4                | 4               | 21m56s                                | 4/4                | 4               | 21m56s             |
| MiSeq | 1 <sup>d</sup>      | 2/4                | 1               | 1m11s                | 4/4                | 8               | 1m11s                                 | 4/4                | 7               | 1m11s                                 | 4/4                | 5               | 1m11s              |
| MiSeq | 2 <sup>e</sup>      | 2/4                | 0               | 1m23s                | 4/4                | 2               | 1m23s                                 | 4/4                | 2               | 1m23s                                 | 4/4                | 2               | 1m23s              |
| MiSeq | 1+2 <sup>f</sup>    | 4/4                | 3               | 2m45s                | 4/4                | 8               | 2m45s                                 | 4/4                | 7               | 2m45s                                 | 4/4                | 6               | 2m45s              |

  

| Illumina Sequencer | QQ-SNV <sub>HS-P80</sub> <sup>a</sup> |                    |                 | QQ-SNV <sub>HS-P85</sub> <sup>a</sup> |                    |                 | QQ-SNV <sub>HS-P90</sub> <sup>a</sup> |                    |                 | QQ-SNV <sub>HS-P95</sub> <sup>a</sup> |                    |                 |                    |
|--------------------|---------------------------------------|--------------------|-----------------|---------------------------------------|--------------------|-----------------|---------------------------------------|--------------------|-----------------|---------------------------------------|--------------------|-----------------|--------------------|
|                    | Pair                                  | sens. <sup>b</sup> | FP <sup>c</sup> | time <sup>gh</sup>                    | sens. <sup>b</sup> | FP <sup>c</sup> | time <sup>gh</sup>                    | sens. <sup>b</sup> | FP <sup>c</sup> | time <sup>gh</sup>                    | sens. <sup>b</sup> | FP <sup>c</sup> | time <sup>gh</sup> |
| GAllx              | 1 <sup>d</sup>                        | 4/4                | 2               | 12m51s                                | 4/4                | 2               | 12m51s                                | 4/4                | 2               | 12m51s                                | 4/4                | 1               | 12m51s             |
| GAllx              | 2 <sup>e</sup>                        | 4/4                | 1               | 13m5s                                 | 4/4                | 1               | 13m5s                                 | 4/4                | 1               | 13m5s                                 | 4/4                | 0               | 13m5s              |
| GAllx              | 1+2 <sup>f</sup>                      | 4/4                | 4               | 21m56s                                | 4/4                | 4               | 21m56s                                | 4/4                | 4               | 21m56s                                | 4/4                | 4               | 21m56s             |
| MiSeq              | 1 <sup>d</sup>                        | 4/4                | 5               | 1m11s                                 | 4/4                | 4               | 1m11s                                 | 4/4                | 3               | 1m11s                                 | 4/4                | 2               | 1m11s              |
| MiSeq              | 2 <sup>e</sup>                        | 4/4                | 2               | 1m23s                                 | 4/4                | 2               | 1m23s                                 | 4/4                | 2               | 1m23s                                 | 4/4                | 0               | 1m23s              |
| MiSeq              | 1+2 <sup>f</sup>                      | 4/4                | 6               | 2m45s                                 | 4/4                | 5               | 2m45s                                 | 4/4                | 5               | 2m45s                                 | 4/4                | 1               | 2m45s              |

<sup>a</sup>50<sup>th</sup>/75<sup>th</sup>/80<sup>th</sup>/85<sup>th</sup>/90<sup>th</sup>/95<sup>th</sup> percentile of the QQ-SNV<sub>HS</sub> distribution of “error” frequencies was used as frequency cutoff to decrease the number of false positives obtained with QQ-SNV<sub>HS</sub>.

<sup>b</sup>sens. is the percentage of SNVs as identified in [12] that were called as SNV by QQ-SNV in region 405-425 of NA gene in H1N1 BN3 sample.

<sup>c</sup>FP is the number of “non-variants” in [12] that were called as SNV by QQ-SNV.

<sup>d</sup>Reads 1 of paired-end reads.

<sup>e</sup>Reads 2 of paired-end reads (sequenced after paired-end turn).

<sup>f</sup>All paired-end reads.

<sup>g</sup>computation time in minutes (m) and seconds (s).

<sup>h</sup>Windows 7 64 bit, 8GB RAM, 3.2GHz.
