# Supplementary material for: QQ-SNV: single nucleotide variant detection at low frequency by comparing the quality quantiles
Source: PubMed Central journal article supplement (PMC4641353; doi:10.1186/s12859-015-0812-9), 2015-11-10
Supplement: 12859_2015_812_MOESM3_ESM.pdf [file 12859_2015_812_MOESM3_ESM.pdf]

## Supporting evidence for stability of coefficients in quality score recalibration model

Bootstrap 95% confidence interval for model parameters of Table 1.

|           | <b>2.5 %</b> | <b>97.5 %</b> |
|-----------|--------------|---------------|
| Intercept | 0.35955614   | 1.2820099     |
| QUAL      | -0.15842187  | -0.1577792    |
| RELPOS    | -0.91237613  | -0.8778055    |
