# Supplementary material for: QQ-SNV: single nucleotide variant detection at low frequency by comparing the quality quantiles
Source: PubMed Central journal article supplement (PMC4641353; doi:10.1186/s12859-015-0812-9), 2015-11-10

# Supporting evidence for applicability of QQ-SNV on Illumina NGS data of any read length

Reference sequence: KC866600

Illumina Miseq 250bp

Analysis on all paired-end reads

True variants: 334C>T, 625A>T (data from [28])

QQ-SNV predicted SNV probability for the true variants for plasmid mix ratios 95:5, 99:1 and 99.9:0.1

|                                          | 95:5         | 99:1         | 99.9:0.1     |                                                                                 |
|------------------------------------------|--------------|--------------|--------------|---------------------------------------------------------------------------------|
| Average coverage depth (number of reads) | 26,663       | 23,659       | 29,090       |                                                                                 |
|                                          | P(SNV)       | P(SNV)       | P(SNV)       |                                                                                 |
| 334C>T                                   | 0.9999761488 | 0.9997707282 | 0.5613726795 |                                                                                 |
| 625A>T                                   | 0.9999456703 | 0.9992583561 | 0.9989070416 | 625A>T filtered by frequency for QQ-SNV <sub>HS-P80</sub> at mix ratio 99.9:0.1 |

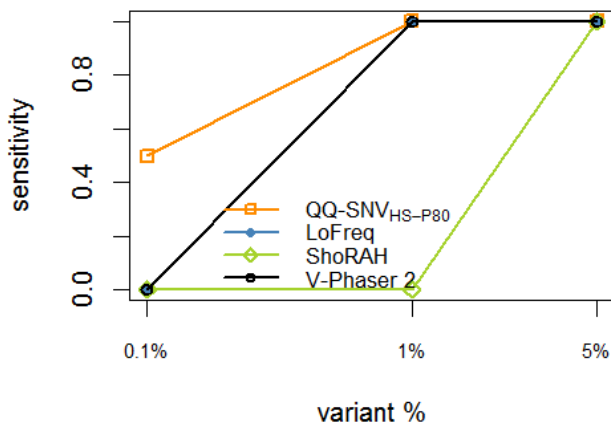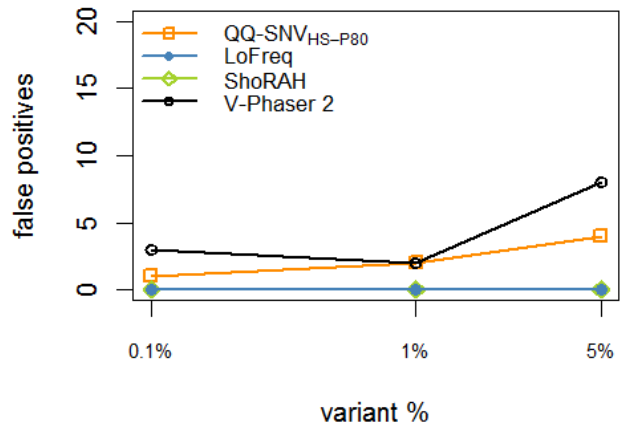

Supplement: 12859_2015_812_MOESM5_ESM.pdf [file 12859_2015_812_MOESM5_ESM.pdf]
